# Supplementary material for: Network Pharmacology-Based Approach to Investigate the Mechanisms of Hedyotis diffusa Willd. in the Treatment of Gastric Cancer
Source: Evid Based Complement Alternat Med. 2018 May 2;2018:7802639. doi: 10.1155/2018/7802639 (PMC5954954; doi:10.1155/2018/7802639)
Supplement: Supplementary 1 — Table S1: herbal compounds in HDW. [file 7802639.f1.xlsx]

## Sheet: Sheet1
Table S1 Herbal compounds in HDW.
Herbal compounds	Source
2,3-dimethoxy-6-methyanthraquinone	TCMSP
geniposide	TCMSP
genipin	TCMSP
2-hydroxy-3-methylanthraquinone	TCMSP
E-6-O-p-methoxycinnamoyl scandoside methyl ester	TCMSP
E-6-O-p-methoxycinnamoyl scandoside methyl ester_qt	TCMSP
1H-2,6-dioxacyclopent(cd)inden-1-one, 4-((acetyloxy)methyl)-5-(beta-D-glucopyranosyloxy)-2a,4a,5,7b-tetrahydro-, (2aS-(2aalpha,5alpha,7balpha))-	TCMSP
asperuloside_qt	TCMSP
Oleanolic acid-28-O-beta-D-glucopyranoside	TCMSP
oleanolic acid-3-O-β-D-glucuronopyranoside_qt	TCMSP
(1S,4aS,5R,7aS)-5-hydroxy-7-methylol-1-[(2S,3R,4S,5S,6R)-3,4,5-trihydroxy-6-methylol-tetrahydropyran-2-yl]oxy-1,4a,5,7a-tetrahydrocyclopenta[d]pyran-4-carboxylic acid	TCMSP
scandoside_qt	TCMSP
3'-Hydroxyanethole	TCMSP
Poriferasterol	TCMSP
p-MCA	TCMSP
Scandoside methyl ester	TCMSP
scandoside_qt	TCMSP
(4aS,6aR,6aS,6bR,8aR,10R,12aR,14bS)-10-hydroxy-2,2,6a,6b,9,9,12a-heptamethyl-1,3,4,5,6,6a,7,8,8a,10,11,12,13,14b-tetradecahydropicene-4a-carboxylic acid	TCMSP
deacetylasperulosidic acid	TCMSP
deacetylasperulosidic acid _qt	TCMSP
Deacetyl asperulosidic acid methyl ester	TCMSP
deacetyl asperuloside acid_qt	TCMSP
Geniposidic acid	TCMSP
geniposidie acid_qt	TCMSP
2-methoxy-3-methyl-9,10-anthraquinone	TCMSP
Digitolutein	TCMSP
Stigmasterol	TCMSP
succinic acid	TCMSP
Sitogluside	TCMSP
beta-sitosterol	TCMSP
FER	TCMSP
Scopoletol	TCMSP
rutin	TCMSP
ursolic acid	TCMSP
darutoside	TCMSP
p-coumaric acid	TCMSP
quercetin	TCMSP
(b)-sitosterol	TCMID
2,3-dimethoxy-6-methyl-anthraquinone	TCMID
2-hydroxy-3-methylanthraquinone	TCMID
2-methyl-3-hydroxy-4-methoxy-anthraquinone	TCMID
3-hydroxy-2-methyl-anthraquinone	TCMID
4,4-hydroxy- between coca acid	TCMID
5-o-p-methoxy cinnamoyl scandoside methylester	TCMID
6-O- on- hydroxy cinnamic acid methyl glucoside Paederia times	TCMID
6-O- on- methoxy cinnamic acid methyl glucoside Paederia times	TCMID
6-o-e-p-coumaroyl scandoside methyl ester	TCMID
6-o-z-p-coumaroyl scandoside methyl ester	TCMID
6-o-z-p-methoxycinnamoyl scandoside methylester	TCMID
asperulosidic acid	TCMID
asperulosidicacid	TCMID
Bai hua she she cao su	TCMID
beta-Sitosterol	TCMID
Car leaves glyphosate	TCMID
Cassia glycosides of quercetin-3-O-	TCMID
coumaric acid	TCMID
coumarin	TCMID
Gallate are oak	TCMID
Hentriaconta-	TCMID
hentriacontane	TCMID
kaempferol 3-o-[(6-o-feruloyl)-β-d-glucopy-ranosyl-(1→2)-β-d-galactopyranoside]	TCMID
Kaempferol-3-O- [2-O-(6-O-E- ferulyl)-β-D- glucopyranosyl]-β-D- galactopyranoside	TCMID
Kaempferol-3-O-(2-O-β-D- glucopyranosyl)-β-D- galactopyranoside	TCMID
oleanolic acid	TCMID
oleanolic acid	TCMID
Oleanolic Acid	TCMID
oleanolic acid-28-o-beta-d-glucopyranoside	TCMID
oleanolicacid	TCMID
p-cumaric acid	TCMID
Paederia times glycosides	TCMID
Paederia times methyl glucoside	TCMID
panasenoside	TCMID
Panasenoside	TCMID
Quercetin-3-O- glucopyranoside	TCMID
Quercetin-3-O- [2-O-(6-O-E- ferulyl)-β-D- glucopyranosyl]-β-D- galactopyranoside	TCMID
Quercetin-3-O-(2-O-β-D- glucopyranosyl)-β-D- galactopyranoside	TCMID
quercetin-3-o-[(6-o-feruloyl)-β-d-glucopyra-nosyl-(1→2)-β-d-galactopyranoside]	TCMID
quercetin-3-o-[2-o-(6-o-e-feruloyl)-β-d-glu-copyranosyl]-β-d-glucopyranoside	TCMID
quercetin-3-o-[2-o-(6-o-e-sinapoyl)-β-d-glu-copyranosyl]-β-d-glucopyranoside	TCMID
quercetin-3-o-[β-d-glucopyranosyl-(1→2)-β-d-galactopyranoside]	TCMID
Sitosteryl glucoside	TCMID
stigmasterol	TCMID
stigmasterol	TCMID
stigmasterol	TCMID
Stigmasterol-5,22- diene-3β, 7α- glycol	TCMID
Stigmasterol-5,22- diene-3β, 7β- glycol	TCMID
stigmasterol-beta-d-glucoside	TCMID
trans-4-methoxycinnamyl alcohol	TCMID
triterpenes	TCMID
Ursolic	TCMID
ursolicacid	TCMID
ursonic acid	TCMID
β- sitosterol-β-D- glucoside	TCMID
