# Supplementary material for: Network Pharmacology-Based Approach to Investigate the Mechanisms of Hedyotis diffusa Willd. in the Treatment of Gastric Cancer
Source: Evid Based Complement Alternat Med. 2018 May 2;2018:7802639. doi: 10.1155/2018/7802639 (PMC5954954; doi:10.1155/2018/7802639)
Supplement: Supplementary 2 — Table S2: herbal compounds with structural information. [file 7802639.f2.xlsx]

## Sheet: Sheet1
Table S2 Herbal compounds with structural information.
Herbal compounds	SMILES	Molecular formula	PubChem CID
6-O-E-p-coumaroyl scandoside methyl ester	COC(=O)C1=COC(C2C1C(C=C2CO)OC(=O)/C=C/C3=CC=C(C=C3)O)O[C@H]4[C@@H]([C@H]([C@@H]([C@H](O4)CO)O)O)O	C26H30O13	101396047
quercetin-3-o-[(6-o-feruloyl)-β-d-glucopyra-nosyl-(1→2)-β-d-galactopyranoside]	COC1=C(C=CC(=C1)/C=C/C(=O)OC[C@@H]2[C@H]([C@@H]([C@H]([C@@H](O2)O[C@@H]3[C@H]([C@@H]([C@H](O[C@H]3OC4=C(OC5=CC(=CC(=C5C4=O)O)O)C6=CC(=C(C=C6)O)O)CO)O)O)O)O)O)O	C37H38O20	44584780
2,3-dimethoxy-6-methyanthraquinone	C1CC2C(C(=O)C3C(CC(OC)C(OC)C3)C2=O)C(C1)C	C17H14O4	N/A
2-hydroxy-3-methylanthraquinone	CC1=C(C=C2C(=C1)C(=O)C3=CC=CC=C3C2=O)O	C15H10O3	10889963
2-methyl-3-methoxyanthraquinone	CC1=C(C=C2C(=C1)C(=O)C3=CC=CC=C3C2=O)OC	C16H12O3	10514946
3-(4-Methoxyphenyl)-2-propen-1-ol	COC1=CC=C(C=C1)/C=C/CO	C10H12O2	5314180
3-epioleanolic acid	C[C@]12CC[C@H](C([C@@H]1CC[C@@]3([C@@H]2CC=C4[C@]3(CC[C@@]5([C@H]4CC(CC5)(C)C)C(=O)O)C)C)(C)C)O	C30H48O3	11869658
4-methoxycinnamic acid	COC1=CC=C(C=C1)/C=C/C(=O)O	C10H10O3	699414
6-O-Z-p-coumaroyl scandoside methyl ester	COC(=O)C1=CO[C@H]([C@H]2[C@@H]1[C@@H](C=C2CO)OC(=O)/C=C\C3=CC=C(C=C3)O)O[C@H]4[C@@H]([C@H]([C@@H]([C@H](O4)CO)O)O)O	C26H30O13	44584783
asperuloside	CC(=O)OCC1=C[C@H]2[C@H]3[C@@H]1[C@@H](OC=C3C(=O)O2)O[C@H]4[C@@H]([C@H]([C@@H]([C@H](O4)CO)O)O)O	C18H22O11	84298
asperulosidic acid	CC(=O)OCC1=C[C@@H]([C@H]2[C@@H]1[C@@H](OC=C2C(=O)O)O[C@H]3[C@@H]([C@H]([C@@H]([C@H](O3)CO)O)O)O)O	C18H24O12	11968867
coumarin	C1=CC=C2C(=C1)C=CC(=O)O2	C9H6O2	323
deacetylasperulosidic acid	C1=C([C@@H]2[C@H]([C@H]1O)C(=CO[C@H]2O[C@H]3[C@@H]([C@H]([C@@H]([C@H](O3)CO)O)O)O)C(=O)O)CO	C16H22O11	12315350
deacetylasperulosidic acid methyl ester	COC(=O)C1=CO[C@H]([C@H]2[C@@H]1[C@H](C=C2CO)O)O[C@H]3[C@@H]([C@H]([C@@H]([C@H](O3)CO)O)O)O	C17H24O11	6325021
digitolutein	CC1=C(C(=C2C(=C1)C(=O)C3=CC=CC=C3C2=O)OC)O	C16H12O4	160475
E-6-O-p-methoxycinnamoyl scandoside methyl ester	COC(=O)C1=CO[C@H]([C@H]2[C@@H]1[C@@H](C=C2CO)OC(=O)/C=C\C1CCC(CC1)O)O[C@H]1[C@@H]([C@H]([C@@H]([C@H](O1)CO)O)O)O	C26H30O13	N/A
ferulic acid	COC1=C(C=CC(=C1)/C=C/C(=O)O)O	C10H10O4	445858
genipin	COC(=O)C1=CO[C@H]([C@H]2[C@@H]1CC=C2CO)O	C11H14O5	442424
geniposide	COC(=O)C1=CO[C@H]([C@H]2[C@@H]1CC=C2CO)O[C@H]3[C@@H]([C@H]([C@@H]([C@H](O3)CO)O)O)O	C17H24O10	107848
geniposidic acid	C1C=C([C@@H]2[C@H]1C(=CO[C@H]2O[C@H]3[C@@H]([C@H]([C@@H]([C@H](O3)CO)O)O)O)C(=O)O)CO	C16H22O10	443354
hentriaconta-17,27-diene-2,4,6,30-tetrayne-1,8,29-triol	C#CC(C=CCCCCCCCCC=CCCCCCCCCC(C#CC#CC#CCO)O)O	C31H44O3	5549
hentriacontane	CCCCCCCCCCCCCCCCCCCCCCCCCCCCCCC	C31H64	12410
notoginseng triterpenes	CC(=CCC[C@@H](CO[C@H]1[C@@H]([C@H]([C@@H]([C@H](O1)CO[C@H]2[C@@H]([C@H]([C@@H](O2)CO)O)O)O)O)O)[C@H]3CCC4(C3[C@H](C[C@@H]5C4(CC[C@H]6[C@]5(CC[C@H](C6(C)C)O[C@H]7[C@H]([C@@H]([C@H]([C@@H](O7)CO)O)O)O)C)C)O)C)C	C47H80O17	122130345
oleanolic acid	C[C@]12CC[C@@H](C([C@@H]1CC[C@@]3([C@@H]2CC=C4[C@]3(CCC5[C@H]4CC(C[C@H]5C(=O)O)(C)C)C)C)(C)C)O	C30H48O3	49867939
oleanolic acid-28-O-β-D-glucopyranoside	C[C@]12CC[C@@H](C(C1CC[C@@]3(C2CC=C4[C@]3(CC[C@@]5(C4CC(CC5)(C)C)C(=O)O[C@H]6[C@@H]([C@H]([C@@H]([C@H](O6)CO)O)O)O)C)C)(C)C)O	C36H58O8	10416408
panasenoside	C1=CC(=CC=C1C2=C(C(=O)C3=C(C=C(C=C3O2)O)O)O[C@H]4C(C([C@H](C(O4)CO)O)O)O[C@H]5[C@@H](C([C@@H](C(O5)CO)O)O)O)O	C27H30O16	44258739
p-coumaric acid	C1=CC(=CC=C1/C=C/C(=O)O)O	C9H8O3	637542
poriferasterol	CC[C@@H](/C=C/[C@@H](C)[C@H]1CC[C@@H]2[C@@]1(CC[C@H]3[C@H]2CC=C4[C@@]3(CC[C@@H](C4)O)C)C)C(C)C	C29H48O	5281330
quercetin	C1=CC(=C(C=C1C2=C(C(=O)C3=C(C=C(C=C3O2)O)O)O)O)O	C15H10O7	5280343
quercetin 3-O-β-D-glucosylgalactoside	C1=CC(=C(C=C1C2=C(C(=O)C3=C(C=C(C=C3O2)O)O)O[C@H]4[C@@H]([C@H]([C@H]([C@H](O4)CO)O)O)O[C@H]5[C@@H]([C@H]([C@@H]([C@H](O5)CO)O)O)O)O)O	C27H30O17	14185728
rutin	C[C@H]1[C@@H]([C@H]([C@H]([C@@H](O1)OC[C@@H]2[C@H]([C@@H]([C@H]([C@@H](O2)OC3=C(OC4=CC(=CC(=C4C3=O)O)O)C5=CC(=C(C=C5)O)O)O)O)O)O)O)O	C27H30O16	5280805
scandoside	C1=C([C@@H]2[C@H]([C@@H]1O)C(=CO[C@H]2O[C@H]3[C@@H]([C@H]([C@@H]([C@H](O3)CO)O)O)O)C(=O)O)CO	C16H22O11	21602023
scandoside methyl ester	COC(=O)C1=CO[C@H]([C@H]2[C@@H]1[C@@H](C=C2CO)O)O[C@H]3[C@@H]([C@H]([C@@H]([C@H](O3)CO)O)O)O	C17H24O11	442433
scopoletol	COC1=C(C=C2C(=C1)C=CC(=O)O2)O	C10H8O4	5280460
sitogluside	CC[C@H](CC[C@@H](C)[C@H]1CC[C@@H]2[C@@]1(CC[C@H]3[C@H]2CC=C4[C@@]3(CC[C@@H](C4)O[C@H]5[C@@H]([C@H]([C@@H]([C@H](O5)CO)O)O)O)C)C)C(C)C	C35H60O6	5742590
sitosteryl glucoside	CC[C@H](CC[C@@H](C)[C@H]1CC[C@@H]2[C@@]1(CC[C@H]3[C@H]2CC=C4[C@@]3(CC[C@@H](C4)O[C@H]5C(C([C@@H](C(O5)CO)O)O)O)C)C)C(C)C	C35H60O6	70699351
stigmasterol	CC[C@H](/C=C/[C@@H](C)[C@H]1CC[C@@H]2[C@@]1(CC[C@H]3[C@H]2CC=C4[C@@]3(CC[C@@H](C4)O)C)C)C(C)C	C29H48O	5280794
stigmasteryl β-D-glucoside	CC[C@H](/C=C/[C@@H](C)[C@H]1CC[C@@H]2[C@@]1(CC[C@H]3[C@H]2CC=C4[C@@]3(CC[C@@H](C4)O[C@H]5C(C([C@@H](C(O5)CO)O)O)O)C)C)C(C)C	C35H58O6	70699355
succinic acid	[H+].[H+].C(CC(=O)[O-])C(=O)[O-]	C4H6O4	21952380
trans-4-methoxycinnamyl alcohol	COC1=CC=C(C=C1)C=CCO	C10H12O2	95641
ursolic acid	C[C@@H]1CC[C@@]2(CC[C@@]3(C(=CC[C@H]4[C@]3(CC[C@@H]5[C@@]4(CC[C@@H](C5(C)C)O)C)C)[C@@H]2[C@H]1C)C)C(=O)O	C30H48O3	64945
β-sitosterol	CC[C@H](CC[C@@H](C)[C@H]1CC[C@@H]2[C@@]1(CC[C@H]3[C@H]2CC=C4[C@@]3(CC[C@@H](C4)O)C)C)C(C)C	C29H50O	222284
