# Supplementary material for: Network Pharmacology-Based Approach to Investigate the Mechanisms of Hedyotis diffusa Willd. in the Treatment of Gastric Cancer
Source: Evid Based Complement Alternat Med. 2018 May 2;2018:7802639. doi: 10.1155/2018/7802639 (PMC5954954; doi:10.1155/2018/7802639)
Supplement: Supplementary 3 — Table S3: herbal compounds in HDW and their corresponding targets. [file 7802639.f3.xlsx]

## Sheet: Sheet1
Table S3 Herbal compounds in HDW and their corresponding targets.
Herbal compounds	Targets
	Uniprot ID	Protein names	Gene names
2,3-dimethoxy-6-methyanthraquinone	O75030	Microphthalmia-associated transcription factor	MITF
2,3-dimethoxy-6-methyanthraquinone	P00533	Epidermal growth factor receptor	EGFR
2-hydroxy-3-methylanthraquinone	Q07820	Induced myeloid leukemia cell differentiation protein Mcl-1	MCL1
2-hydroxy-3-methylanthraquinone	Q9Y4P1	Cysteine protease ATG4B	ATG4B
2-hydroxy-3-methylanthraquinone	P10415	Apoptosis regulator Bcl-2	BCL2
2-hydroxy-3-methylanthraquinone	Q9BQF6	Sentrin-specific protease 7	SENP7
2-hydroxy-3-methylanthraquinone	Q9GZR1	Sentrin-specific protease 6	SENP6
2-hydroxy-3-methylanthraquinone	P30305	M-phase inducer phosphatase 2	CDC25B
2-hydroxy-3-methylanthraquinone	Q96LD8	Sentrin-specific protease 8	SENP8
2-hydroxy-3-methylanthraquinone	Q00653	Nuclear factor NF-kappa-B p100 subunit	NFKB2
2-hydroxy-3-methylanthraquinone	Q04206	Transcription factor p65	RELA
2-hydroxy-3-methylanthraquinone	P04054	Phospholipase A2	PLA2G1B
2-hydroxy-3-methylanthraquinone	P42574	Caspase-3	CASP3
2-hydroxy-3-methylanthraquinone	P33261	Cytochrome P450 2C19	CYP2C19
2-hydroxy-3-methylanthraquinone	P11712	Cytochrome P450 2C9	CYP2C9
2-hydroxy-3-methylanthraquinone	P08684	Cytochrome P450 3A4	CYP3A4
2-methyl-3-methoxyanthraquinone	P30305	M-phase inducer phosphatase 2	CDC25B
2-methyl-3-methoxyanthraquinone	Q07820	Induced myeloid leukemia cell differentiation protein Mcl-1	MCL1
2-methyl-3-methoxyanthraquinone	P10415	Apoptosis regulator Bcl-2	BCL2
3-(4-Methoxyphenyl)-2-propen-1-ol	P10636	Microtubule-associated protein tau	MAPT
3-(4-Methoxyphenyl)-2-propen-1-ol	P68363	Tubulin alpha-1B chain	TUBA1B
3-(4-Methoxyphenyl)-2-propen-1-ol	P11509	Cytochrome P450 2A6	CYP2A6
3-(4-Methoxyphenyl)-2-propen-1-ol	Q16678	Cytochrome P450 1B1	CYP1B1
3-(4-Methoxyphenyl)-2-propen-1-ol	P35869	Aryl hydrocarbon receptor	AHR
3-(4-Methoxyphenyl)-2-propen-1-ol	Q9H4B7	Tubulin beta-1 chain	TUBB1
3-(4-Methoxyphenyl)-2-propen-1-ol	P43166	Carbonic anhydrase 7	CA7
3-(4-Methoxyphenyl)-2-propen-1-ol	Q9ULX7	Carbonic anhydrase 14	CA14
3-(4-Methoxyphenyl)-2-propen-1-ol	P39086	Glutamate receptor ionotropic, kainate 1	GRIK1
3-(4-Methoxyphenyl)-2-propen-1-ol	P23219	Prostaglandin G/H synthase 1	PTGS1
3-(4-Methoxyphenyl)-2-propen-1-ol	O43570	Carbonic anhydrase 12	CA12
3-(4-Methoxyphenyl)-2-propen-1-ol	Q16790	Carbonic anhydrase 9	CA9
3-(4-Methoxyphenyl)-2-propen-1-ol	P03372	Estrogen receptor	ESR1
3-(4-Methoxyphenyl)-2-propen-1-ol	P09917	Arachidonate 5-lipoxygenase	ALOX5
3-(4-Methoxyphenyl)-2-propen-1-ol	P00915	Carbonic anhydrase 1	CA1
3-(4-Methoxyphenyl)-2-propen-1-ol	P35354	Prostaglandin G/H synthase 2	PTGS2
3-(4-Methoxyphenyl)-2-propen-1-ol	P00918	Carbonic anhydrase 2	CA2
3-epioleanolic acid	P18031	Tyrosine-protein phosphatase non-receptor type 1	PTPN1
3-epioleanolic acid	P17706	Tyrosine-protein phosphatase non-receptor type 2	PTPN2
3-epioleanolic acid	P11217	Glycogen phosphorylase, muscle form	PYGM
3-epioleanolic acid	P06746	DNA polymerase beta	POLB
3-epioleanolic acid	P2935	Tyrosine-protein phosphatase non-receptor type 6	PTPN6
3-epioleanolic acid	O60218	Aldo-keto reductase family 1 member B10	AKR1B10
3-epioleanolic acid	Q96RI1	Bile acid receptor	NR1H4
3-epioleanolic acid	Q07817	Bcl-2-like protein 1	BCL2L1
3-epioleanolic acid	P28845	Corticosteroid 11-beta-dehydrogenase isozyme 1	HSD11B1
4-methoxycinnamic acid	P35218	Carbonic anhydrase 5A, mitochondrial	CA5A
4-methoxycinnamic acid	P23280	Carbonic anhydrase 6	CA6
4-methoxycinnamic acid	Q9Y2D0	Carbonic anhydrase 5B, mitochondrial	CA5B
4-methoxycinnamic acid	O00206	Toll-like receptor 4	TLR4
4-methoxycinnamic acid	P43166	Carbonic anhydrase 7	CA7
4-methoxycinnamic acid	Q9UNQ0	ATP-binding cassette sub-family G member 2	ABCG2
4-methoxycinnamic acid	P10636	Microtubule-associated protein tau	MAPT
4-methoxycinnamic acid	P07451	Carbonic anhydrase 3	CA3
4-methoxycinnamic acid	Q9ULX7	Carbonic anhydrase 14	CA14
4-methoxycinnamic acid	P11509	Cytochrome P450 2A6	CYP2A6
4-methoxycinnamic acid	P68363	Tubulin alpha-1B chain	TUBA1B
4-methoxycinnamic acid	O43570	Carbonic anhydrase 12	CA12
4-methoxycinnamic acid	Q99814	Endothelial PAS domain-containing protein 1	EPAS1
4-methoxycinnamic acid	Q16678	Cytochrome P450 1B1	CYP1B1
4-methoxycinnamic acid	P35869	Aryl hydrocarbon receptor	AHR
4-methoxycinnamic acid	Q9H4B7	Tubulin beta-1 chain	TUBB1
4-methoxycinnamic acid	Q16790	Carbonic anhydrase 9	CA9
6-O-Z-p-coumaroyl scandoside methyl ester	P08246	Neutrophil elastase	ELANE
asperuloside	P83916	Chromobox protein homolog 1	CBX1
coumarin	P29274	Adenosine receptor A2a	ADORA2A
coumarin	P30542	Adenosine receptor A1	ADORA1
coumarin	P0DMS8	Adenosine receptor A3	ADORA3
coumarin	P25100	Alpha-1D adrenergic receptor	ADRA1D
coumarin	P08588	Beta-1 adrenergic receptor	ADRB1
coumarin	P13945	Beta-3 adrenergic receptor	ADRB3
coumarin	P15121	Aldose reductase	AKR1B1
coumarin	P08913	Alpha-2A adrenergic receptor	ADRA2A
coumarin	P18089	Alpha-2B adrenergic receptor	ADRA2B
coumarin	P10275	Androgen receptor	AR
coumarin	P50052	Type-2 angiotensin II receptor	AGTR2
coumarin	P07550	Beta-2 adrenergic receptor	ADRB2
coumarin	P56817	Beta-secretase 1	BACE1
coumarin	Q96RI1	Bile acid receptor	NR1H4
coumarin	P30411	B2 bradykinin receptor	BDKRB2
coumarin	P41597	C-C chemokine receptor type 2	CCR2
coumarin	P51679	C-C chemokine receptor type 4	CCR4
coumarin	P51681	C-C chemokine receptor type 5	CCR5
coumarin	P30988	Calcitonin receptor	CALCR
coumarin	P21554	Cannabinoid receptor 1	CNR1
coumarin	P00918	Carbonic anhydrase 2	CA2
coumarin	P08311	Cathepsin G	CTSG
coumarin	P32238	Cholecystokinin receptor type A	CCKAR
coumarin	P22303	Acetylcholinesterase	ACHE
coumarin	P23219	Prostaglandin G/H synthase 1	PTGS1
coumarin	P35354	Prostaglandin G/H synthase 2	PTGS2
coumarin	Q9Y271	Cysteinyl leukotriene receptor 1	CYSLTR1
coumarin	P10635	Cytochrome P450 2D6	CYP2D6
coumarin	P08684	Cytochrome P450 3A4	CYP3A4
coumarin	P21728	D(1A) dopamine receptor	DRD1
coumarin	P14416	D(2) dopamine receptor	DRD2
coumarin	P21917	D(4) dopamine receptor	DRD4
coumarin	P35462	D(3) dopamine receptor	DRD3
coumarin	P25101	Endothelin-1 receptor	EDNRA
coumarin	P00533	Epidermal growth factor receptor	EGFR
coumarin	P03372	Estrogen receptor	ESR1
coumarin	Q92731	Estrogen receptor beta	ESR2
coumarin	P04150	Glucocorticoid receptor	NR3C1
coumarin	Q12809	Potassium voltage-gated channel subfamily H member 2	KCNH2
coumarin	P35367	Histamine H1 receptor	HRH1
coumarin	P25021	Histamine H2 receptor	HRH2
coumarin	P04035	3-hydroxy-3-methylglutaryl-coenzyme A reductase	HMGCR
coumarin	P25025	C-X-C chemokine receptor type 2	CXCR2
coumarin	P25024	C-X-C chemokine receptor type 1	CXCR1
coumarin	P41145	Kappa-type opioid receptor	OPRK1
coumarin	P08246	Neutrophil elastase	ELANE
coumarin	Q16539	Mitogen-activated protein kinase 14	MAPK14
coumarin	P03956	Interstitial collagenase	MMP1
coumarin	P14780	Matrix metalloproteinase-9	MMP9
coumarin	P41968	Melanocortin receptor 3	MC3R
coumarin	P32245	Melanocortin receptor 4	MC4R
coumarin	P21397	Amine oxidase [flavin-containing] A	MAOA
coumarin	Q01959	Sodium-dependent dopamine transporter	SLC6A3
coumarin	P20309	Muscarinic acetylcholine receptor M3	CHRM3
coumarin	P08172	Muscarinic acetylcholine receptor M2	CHRM2
coumarin	P08173	Muscarinic acetylcholine receptor M4	CHRM4
coumarin	P08912	Muscarinic acetylcholine receptor M5	CHRM5
coumarin	P11229	Muscarinic acetylcholine receptor M1	CHRM1
coumarin	P25103	Substance-P receptor	TACR1
coumarin	P21452	Substance-K receptor	TACR2
coumarin	P25929	Neuropeptide Y receptor type 1	NPY1R
coumarin	P49146	Neuropeptide Y receptor type 2	NPY2R
coumarin	P41143	Delta-type opioid receptor	OPRD1
coumarin	P35372	Mu-type opioid receptor	OPRM1
coumarin	O76074	cGMP-specific 3',5'-cyclic phosphodiesterase	PDE5A
coumarin	P25105	Platelet-activating factor receptor	PTAFR
coumarin	P17252	Protein kinase C alpha type	PRKCA
coumarin	P04626	Receptor tyrosine-protein kinase erbB-2	ERBB2
coumarin	P28335	5-hydroxytryptamine receptor 2C	HTR2C
coumarin	P28223	5-hydroxytryptamine receptor 2A	HTR2A
coumarin	P41595	5-hydroxytryptamine receptor 2B	HTR2B
coumarin	P50406	5-hydroxytryptamine receptor 6	HTR6
coumarin	P23975	Sodium-dependent noradrenaline transporter	SLC6A2
coumarin	P31645	Sodium-dependent serotonin transporter	SLC6A4
coumarin	P02768	Serum albumin	ALB
coumarin	Q99720	Sigma non-opioid intracellular receptor 1	SIGMAR1
coumarin	P24557	Thromboxane-A synthase	TBXAS1
coumarin	P06241	Tyrosine-protein kinase Fyn	FYN
coumarin	P06239	Tyrosine-protein kinase Lck	LCK
coumarin	P17948	Vascular endothelial growth factor receptor 1	FLT1
coumarin	P32241	Vasoactive intestinal polypeptide receptor 1	VIPR1
coumarin	P37288	Vasopressin V1a receptor	AVPR1A
coumarin	AVPR1A	Alpha-2C adrenergic receptor	ADRA2C
coumarin	P17538	Chymotrypsinogen B	CTRB1
coumarin	P07451	Carbonic anhydrase 3	CA3
coumarin	P00915	Carbonic anhydrase 1	CA1
coumarin	P22748	Carbonic anhydrase 4	CA4
coumarin	P35218	Carbonic anhydrase 5A, mitochondrial	CA5A
coumarin	Q9Y2D0	Carbonic anhydrase 5B, mitochondrial	CA5B
coumarin	P23280	Carbonic anhydrase 6	CA6
coumarin	P43166	Carbonic anhydrase 7	CA7
coumarin	O43570	Carbonic anhydrase 12	CA12
coumarin	Q8N1Q1	Carbonic anhydrase 13	CA13
coumarin	Q9ULX7	Carbonic anhydrase 14	CA14
coumarin	Q16790	Carbonic anhydrase 9	CA9
coumarin	P29466	Caspase-1	CASP1
coumarin	P05177	Cytochrome P450 1A2	CYP1A2
coumarin	P11509	Cytochrome P450 2A6	CYP2A6
coumarin	P33261	Cytochrome P450 2C19	CYP2C19
coumarin	P11712	Cytochrome P450 2C9	CYP2C9
coumarin	P05181	Cytochrome P450 2E1	CYP2E1
coumarin	Q9UNA4	DNA polymerase iota	POLI
coumarin	O14980	Exportin-1	XPO1
coumarin	P04406	Glyceraldehyde-3-phosphate dehydrogenase	GAPDH
coumarin	P08575	Receptor-type tyrosine-protein phosphatase C	PTPRC
coumarin	P27361	Mitogen-activated protein kinase 3	MAPK3
coumarin	P33032	Melanocortin receptor 5	MC5R
coumarin	P28482	Mitogen-activated protein kinase 1	MAPK1
coumarin	Q9NR56	Muscleblind-like protein 1	MBNL1
coumarin	Q16236	Nuclear factor erythroid 2-related factor 2	NFE2L2
coumarin	P02545	Prelamin-A/C	LMNA
coumarin	Q01196	Runt-related transcription factor 1	RUNX1
coumarin	Q08209	Serine/threonine-protein phosphatase 2B catalytic subunit alpha isoform	PPP3CA
coumarin	Q9Y6L6	Solute carrier organic anion transporter family member 1B1	SLCO1B1
coumarin	Q9NPD5	Solute carrier organic anion transporter family member 1B3	SLCO1B3
coumarin	O94956	Solute carrier organic anion transporter family member 2B1	SLCO2B1
coumarin	Q00796	Sorbitol dehydrogenase	SORD
coumarin	P10828	Thyroid hormone receptor beta	THRB
coumarin	P07477	Trypsin-1	PRSS1
coumarin	Q9NUW8	Tyrosyl-DNA phosphodiesterase 1	TDP1
coumarin	O94782	Ubiquitin carboxyl-terminal hydrolase 1	USP1
coumarin	P27338	Amine oxidase [flavin-containing] B	MAOB
coumarin	P06401	Progesterone receptor	PGR
digitolutein	Q9BQF6	Sentrin-specific protease 7	SENP7
digitolutein	P07900	Heat shock protein HSP 90-alpha	HSP90AA1
digitolutein	P10415	Apoptosis regulator Bcl-2	BCL2
E-6-O-p-methoxycinnamoyl scandoside methyl ester	P08246	Neutrophil elastase	ELANE
ferulic acid	P35218	Carbonic anhydrase 5A, mitochondrial	CA5A
ferulic acid	P23280	Carbonic anhydrase 6	CA6
ferulic acid	Q9H4B7	Tubulin beta-1 chain	TUBB1
ferulic acid	Q9Y2D0	Carbonic anhydrase 5B, mitochondrial	CA5B
ferulic acid	P43166	Carbonic anhydrase 7	CA7
ferulic acid	Q9BVA1	Tubulin beta-2B chain	TUBB2B
ferulic acid	Q04760	Lactoylglutathione lyase	GLO1
ferulic acid	P09917	Arachidonate 5-lipoxygenase	ALOX5
ferulic acid	P11926	Ornithine decarboxylase	ODC1
ferulic acid	P05067	Amyloid-beta A4 protein	APP
ferulic acid	P10636	Microtubule-associated protein tau	MAPT
ferulic acid	Q9Y4P1	Cysteine protease ATG4B	ATG4B
ferulic acid	P27338	Amine oxidase [flavin-containing] B	MAOB
ferulic acid	Q8TDC3	Serine/threonine-protein kinase BRSK1	BRSK1
ferulic acid	P21397	Amine oxidase [flavin-containing] A	MAOA
ferulic acid	O43570	Carbonic anhydrase 12	CA12
ferulic acid	Q13627	Dual specificity tyrosine-phosphorylation-regulated kinase 1A	DYRK1A
ferulic acid	Q9ULX7	Carbonic anhydrase 14	CA14
ferulic acid	Q9Y5S1	Transient receptor potential cation channel subfamily V member 2	TRPV2
ferulic acid	P55789	FAD-linked sulfhydryl oxidase ALR	GFER
ferulic acid	P07451	Carbonic anhydrase 3	CA3
ferulic acid	Q9HBA0	Transient receptor potential cation channel subfamily V member 4	TRPV4
ferulic acid	Q9HBY8	Serine/threonine-protein kinase Sgk2	SGK2
ferulic acid	Q16790	Carbonic anhydrase 9	CA9
genipin	P60033	CD81 antigen	CD81
hentriacontane	O15245	Solute carrier family 22 member 1	SLC22A1
hentriacontane	Q05193	Dynamin-1	DNM1
hentriacontane	O00748	Cocaine esterase	CES2
hentriacontane	P23141	Liver carboxylesterase 1	CES1
hentriacontane	O15244	Solute carrier family 22 member 2	SLC22A2
hentriacontane	Q02083	N-acylethanolamine-hydrolyzing acid amidase	NAAA
hentriacontane	P43351	DNA repair protein RAD52 homolog	RAD52
hentriacontane	P07900	Heat shock protein HSP 90-alpha	HSP90AA1
hentriacontane	P37288	Vasopressin V1a receptor	AVPR1A
oleanolic acid	P18031	Tyrosine-protein phosphatase non-receptor type 1	PTPN1
oleanolic acid	O60218	Aldo-keto reductase family 1 member B10	AKR1B10
oleanolic acid	P11217	Glycogen phosphorylase, muscle form	PYGM
oleanolic acid-28-O-β-D-glucopyranoside	P06746	DNA polymerase beta	POLB
oleanolic acid-28-O-β-D-glucopyranoside	P17706	Tyrosine-protein phosphatase non-receptor type 2	PTPN2
oleanolic acid-28-O-β-D-glucopyranoside	P18031	Tyrosine-protein phosphatase non-receptor type 1	PTPN1
oleanolic acid-28-O-β-D-glucopyranoside	P07900	Heat shock protein HSP 90-alpha	HSP90AA1
oleanolic acid-28-O-β-D-glucopyranoside	P30559	Oxytocin receptor	OXTR
oleanolic acid-28-O-β-D-glucopyranoside	P37288	Vasopressin V1a receptor	AVPR1A
panasenoside	P07237	Protein disulfide-isomerase	P4HB
panasenoside	P51812	Ribosomal protein S6 kinase alpha-3	RPS6KA3
panasenoside	P09923	Intestinal-type alkaline phosphatase	ALPI
panasenoside	Q13627	Dual specificity tyrosine-phosphorylation-regulated kinase 1A	DYRK1A
panasenoside	P15121	Aldose reductase	AKR1B1
panasenoside	Q07820	Induced myeloid leukemia cell differentiation protein Mcl-1	MCL1
panasenoside	P10635	Cytochrome P450 2D6	CYP2D6
panasenoside	P08684	Cytochrome P450 3A4	CYP3A4
p-coumaric acid	P15121	Aldose reductase	AKR1B1
p-coumaric acid	P00918	Carbonic anhydrase 2	CA2
p-coumaric acid	P35354	Prostaglandin G/H synthase 2	PTGS2
p-coumaric acid	P00533	Epidermal growth factor receptor	EGFR
p-coumaric acid	P03372	Estrogen receptor	ESR1
p-coumaric acid	Q8TDS4	Hydroxycarboxylic acid receptor 2	HCAR2
p-coumaric acid	Q13093	Platelet-activating factor acetylhydrolase	PLA2G7
p-coumaric acid	P14679	Tyrosinase	TYR
p-coumaric acid	O60218	Aldo-keto reductase family 1 member B10	AKR1B10
p-coumaric acid	Q04828	Aldo-keto reductase family 1 member C1	AKR1C1
p-coumaric acid	P52895	Aldo-keto reductase family 1 member C2	AKR1C2
p-coumaric acid	P17516	Aldo-keto reductase family 1 member C4	AKR1C4
p-coumaric acid	P42330	Aldo-keto reductase family 1 member C3	AKR1C3
p-coumaric acid	P07451	Carbonic anhydrase 3	CA3
p-coumaric acid	P00915	Carbonic anhydrase 1	CA1
p-coumaric acid	P22748	Carbonic anhydrase 4	CA4
p-coumaric acid	P35218	Carbonic anhydrase 5A, mitochondrial	CA5A
p-coumaric acid	Q9Y2D0	Carbonic anhydrase 5B, mitochondrial	CA5B
p-coumaric acid	P23280	Carbonic anhydrase 6	CA6
p-coumaric acid	P43166	Carbonic anhydrase 7	CA7
p-coumaric acid	O43570	Carbonic anhydrase 12	CA12
p-coumaric acid	Q9ULX7	Carbonic anhydrase 14	CA14
p-coumaric acid	Q16790	Carbonic anhydrase 9	CA9
p-coumaric acid	P23467	Receptor-type tyrosine-protein phosphatase beta	PTPRB
p-coumaric acid	Q8N1Q1	Carbonic anhydrase 13	CA13
p-coumaric acid	P27695	DNA-(apurinic or apyrimidinic site) lyase	APEX1
p-coumaric acid	P03956	Interstitial collagenase	MMP1
p-coumaric acid	P08253	72 kDa type IV collagenase	MMP2
p-coumaric acid	Q99814	Endothelial PAS domain-containing protein 1	EPAS1
p-coumaric acid	P14780	Matrix metalloproteinase-9	MMP9
poriferasterol	P05093	Steroid 17-alpha-hydroxylase/17,20 lyase	CYP17A1
poriferasterol	Q9UBM7	7-dehydrocholesterol reductase	DHCR7
poriferasterol	Q15125	3-beta-hydroxysteroid-Delta(8),Delta(7)-isomerase	EBP
poriferasterol	Q13133	Oxysterols receptor LXR-alpha	NR1H3
poriferasterol	P11413	Glucose-6-phosphate 1-dehydrogenase	G6PD
poriferasterol	Q15465	Sonic hedgehog protein	SHH
poriferasterol	Q8TDU6	G-protein coupled bile acid receptor 1	GPBAR1
poriferasterol	P24557	Thromboxane-A synthase	TBXAS1
poriferasterol	P10635	Cytochrome P450 2D6	CYP2D6
quercetin	P28845	Corticosteroid 11-beta-dehydrogenase isozyme 1	HSD11B1
quercetin	P0DMS8	Adenosine receptor A3	ADORA3
quercetin	P35368	Alpha-1B adrenergic receptor	ADRA1B
quercetin	P15121	Aldose reductase	AKR1B1
quercetin	P35348	Alpha-1A adrenergic receptor	ADRA1A
quercetin	P08913	Alpha-2A adrenergic receptor	ADRA2A
quercetin	P18089	Alpha-2B adrenergic receptor	ADRA2B
quercetin	P10275	Androgen receptor	AR
quercetin	P09917	Arachidonate 5-lipoxygenase	ALOX5
quercetin	P04062	Glucosylceramidase	GBA
quercetin	P56817	Beta-secretase 1	BACE1
quercetin	P06276	Cholinesterase	BCHE
quercetin	P51679	C-C chemokine receptor type 4	CCR4
quercetin	P45983	Mitogen-activated protein kinase 8	MAPK8
quercetin	P00918	Carbonic anhydrase 2	CA2
quercetin	Q00534	Cyclin-dependent kinase 6	CDK6
quercetin	P22303	Acetylcholinesterase	ACHE
quercetin	P06493	Cyclin-dependent kinase 1	CDK1
quercetin	P24941	Cyclin-dependent kinase 2	CDK2
quercetin	P11802	Cyclin-dependent kinase 4	CDK4
quercetin	P23219	Prostaglandin G/H synthase 1	PTGS1
quercetin	P35354	Prostaglandin G/H synthase 2	PTGS2
quercetin	P11511	Aromatase	CYP19A1
quercetin	P10635	Cytochrome P450 2D6	CYP2D6
quercetin	P08684	Cytochrome P450 3A4	CYP3A4
quercetin	P27487	Dipeptidyl peptidase 4	DPP4
quercetin	P11387	DNA topoisomerase 1	TOP1
quercetin	Q02880	DNA topoisomerase 2-beta	TOP2B
quercetin	P11388	DNA topoisomerase 2-alpha	TOP2A
quercetin	P21728	D(1A) dopamine receptor	DRD1
quercetin	P21918	D(1B) dopamine receptor	DRD5
quercetin	P21917	D(4) dopamine receptor	DRD4
quercetin	P00533	Epidermal growth factor receptor	EGFR
quercetin	P03372	Estrogen receptor	ESR1
quercetin	P04150	Glucocorticoid receptor	NR3C1
quercetin	P49841	Glycogen synthase kinase-3 beta	GSK3B
quercetin	P04792	Heat shock protein beta-1	HSPB1
quercetin	Q16665	Hypoxia-inducible factor 1-alpha	HIF1A
quercetin	P25024	C-X-C chemokine receptor type 1	CXCR1
quercetin	P41145	Kappa-type opioid receptor	OPRK1
quercetin	Q16539	Mitogen-activated protein kinase 14	MAPK14
quercetin	P53778	Mitogen-activated protein kinase 12	MAPK12
quercetin	P03956	Interstitial collagenase	MMP1
quercetin	P08254	Stromelysin-1	MMP3
quercetin	P39900	Macrophage metalloelastase	MMP12
quercetin	P14780	Matrix metalloproteinase-9	MMP9
quercetin	P08253	72 kDa type IV collagenase	MMP2
quercetin	P21397	Amine oxidase [flavin-containing] A	MAOA
quercetin	P27338	Amine oxidase [flavin-containing] B	MAOB
quercetin	P33527	Multidrug resistance-associated protein 1	ABCC1
quercetin	P20309	Muscarinic acetylcholine receptor M3	CHRM3
quercetin	CHRM3	Muscarinic acetylcholine receptor M2	CHRM2
quercetin	P08173	Muscarinic acetylcholine receptor M4	CHRM4
quercetin	P11229	Muscarinic acetylcholine receptor M1	CHRM1
quercetin	P05164	Myeloperoxidase	MPO
quercetin	P35372	Mu-type opioid receptor	OPRM1
quercetin	P37231	Peroxisome proliferator-activated receptor gamma	PPARG
quercetin	O76074	cGMP-specific 3',5'-cyclic phosphodiesterase	PDE5A
quercetin	P04054	Phospholipase A2	PLA2G1B
quercetin	P17252	Protein kinase C alpha type	PRKCA
quercetin	P18031	Tyrosine-protein phosphatase non-receptor type 1	PTPN1
quercetin	P23443	Ribosomal protein S6 kinase beta-1	RPS6KB1
quercetin	P31749	RAC-alpha serine/threonine-protein kinase	AKT1
quercetin	O14757	Serine/threonine-protein kinase Chk1	CHEK1
quercetin	P53350	Serine/threonine-protein kinase PLK1	PLK1
quercetin	P08908	5-hydroxytryptamine receptor 1A	HTR1A
quercetin	P28221	5-hydroxytryptamine receptor 1D	HTR1D
quercetin	P46098	5-hydroxytryptamine receptor 3A	HTR3A
quercetin	P50406	5-hydroxytryptamine receptor 6	HTR6
quercetin	P23975	Sodium-dependent noradrenaline transporter	SLC6A2
quercetin	P31645	Sodium-dependent serotonin transporter	SLC6A4
quercetin	P16473	Thyrotropin receptor	TSHR
quercetin	P04637	Cellular tumor antigen p53	TP53
quercetin	P14679	Tyrosinase	TYR
quercetin	P06239	Tyrosine-protein kinase Lck	LCK
quercetin	P36888	Receptor-type tyrosine-protein kinase FLT3	FLT3
quercetin	P47901	Vasopressin V1b receptor	AVPR1B
quercetin	P30518	Vasopressin V2 receptor	AVPR2
quercetin	P12931	Proto-oncogene tyrosine-protein kinase Src	SRC
quercetin	P47989	Xanthine dehydrogenase/oxidase	XDH
quercetin	P15428	15-hydroxyprostaglandin dehydrogenase [NAD(+)]	HPGD
quercetin	P11021	78 kDa glucose-regulated protein	HSPA5
quercetin	P00352	Retinal dehydrogenase 1	ALDH1A1
quercetin	P18825	Alpha-2C adrenergic receptor	ADRA2C
quercetin	P18054	Arachidonate 12-lipoxygenase, 12S-type	ALOX12
quercetin	P16050	Arachidonate 15-lipoxygenase	ALOX15
quercetin	O15296	Arachidonate 15-lipoxygenase B	ALOX15B
quercetin	Q9UNQ0	ATP-binding cassette sub-family G member 2	ABCG2
quercetin	P46063	ATP-dependent DNA helicase Q1	RECQL
quercetin	Q96QE3	ATPase family AAA domain-containing protein 5	ATAD5
quercetin	P17538	Chymotrypsinogen B	CTRB1
quercetin	P08236	Beta-glucuronidase	GUSB
quercetin	P54132	Bloom syndrome protein	BLM
quercetin	P45984	Mitogen-activated protein kinase 9	MAPK9
quercetin	P53779	Mitogen-activated protein kinase 10	MAPK10
quercetin	P0DP23	Calmodulin-1	CALM1
quercetin	Q13554	Calcium/calmodulin-dependent protein kinase type II subunit beta	Q13554
quercetin	Q92887	Canalicular multispecific organic anion transporter 1	ABCC2
quercetin	P07451	Carbonic anhydrase 3	CA3
quercetin	P00915	Carbonic anhydrase 1	CA1
quercetin	P22748	Carbonic anhydrase 4	CA4
quercetin	P35218	Carbonic anhydrase 5A, mitochondrial	CA5A
quercetin	Q9Y2D0	Carbonic anhydrase 5B, mitochondrial	CA5B
quercetin	P23280	Carbonic anhydrase 6	CA6
quercetin	P43166	Carbonic anhydrase 7	CA7
quercetin	O43570	Carbonic anhydrase 12	CA12
quercetin	Q9ULX7	Carbonic anhydrase 14	CA14
quercetin	Q16790	Carbonic anhydrase 9	CA9
quercetin	P16152	Carbonyl reductase [NADPH] 1	CBR1
quercetin	O75828	Carbonyl reductase [NADPH] 3	CBR3
quercetin	P68400	Casein kinase II subunit alpha	CSNK2A1
quercetin	P83916	Chromobox protein homolog 1	CBX1
quercetin	Q99895	Chymotrypsin-C	CTRC
quercetin	P45452	Collagenase 3	MMP13
quercetin	O95067	G2/mitotic-specific cyclin-B2	CCNB2
quercetin	P14635	G2/mitotic-specific cyclin-B1	CCNB1
quercetin	Q00535	Cyclin-dependent-like kinase 5	CDK5
quercetin	P04798	Cytochrome P450 1A1	CYP1A1
quercetin	P05177	Cytochrome P450 1A2	CYP1A2
quercetin	Q16678	Cytochrome P450 1B1	CYP1B1
quercetin	P33261	Cytochrome P450 2C19	CYP2C19
quercetin	P10632	Cytochrome P450 2C8	CYP2C8
quercetin	P11712	Cytochrome P450 2C9	CYP2C9
quercetin	P06746	DNA polymerase beta	POLB
quercetin	Q9Y253	DNA polymerase eta	POLH
quercetin	Q9UNA4	DNA polymerase iota	POLI
quercetin	Q9UBT6	DNA polymerase kappa	POLK
quercetin	P27695	DNA-(apurinic or apyrimidinic site) lyase	APEX1
quercetin	Q99714	3-hydroxyacyl-CoA dehydrogenase type-2	HSD17B10
quercetin	P14061	Estradiol 17-beta-dehydrogenase 1	HSD17B1
quercetin	P37059	Estradiol 17-beta-dehydrogenase 2	HSD17B2
quercetin	HSD17B2	Flap endonuclease 1	FEN1
quercetin	Q9HC97	G-protein coupled receptor 35	GPR35
quercetin	P51570	Galactokinase	GALK1
quercetin	P00390	Glutathione reductase, mitochondrial	GSR
quercetin	Q04760	Lactoylglutathione lyase	GLO1
quercetin	Q00613	Heat shock factor protein 1	HSF1
quercetin	P08238	Heat shock protein HSP 90-beta	HSP90AB1
quercetin	Q03164	Histone-lysine N-methyltransferase 2A	KMT2A
quercetin	Q96KQ7	Histone-lysine N-methyltransferase EHMT2	EHMT2
quercetin	Q9NWT6	Hypoxia-inducible factor 1-alpha inhibitor	HIF1AN
quercetin	P28907	ADP-ribosyl cyclase/cyclic ADP-ribose hydrolase 1	CD38
quercetin	B2RXH2	Lysine-specific demethylase 4E	KDM4E
quercetin	Q15046	Lysine--tRNA ligase	KARS
quercetin	Q99549	M-phase phosphoprotein 8	MPHOSPH8
quercetin	P27361	Mitogen-activated protein kinase 3	MAPK3
quercetin	O15264	Mitogen-activated protein kinase 13	MAPK13
quercetin	Q15759	Mitogen-activated protein kinase 11	MAPK11
quercetin	P49137	MAP kinase-activated protein kinase 2	MAPKAPK2
quercetin	Q8IW41	MAP kinase-activated protein kinase 5	MAPKAPK5
quercetin	P10636	Microtubule-associated protein tau	MAPT
quercetin	P28482	Mitogen-activated protein kinase 1	MAPK1
quercetin	P84022	Mothers against decapentaplegic homolog 3	SMAD3
quercetin	Q9NR56	Muscleblind-like protein 1	MBNL1
quercetin	Q86UN1	Uncharacterized protein HTR5A	HTR5A
quercetin	Q6NUM3	Muscarinic acetylcholine receptor	CHRM5
quercetin	Q9NPH5	NADPH oxidase 4	NOX4
quercetin	Q6W5P4	Neuropeptide S receptor	NPSR1
quercetin	P19838	Nuclear factor NF-kappa-B p105 subunit	NFKB1
quercetin	P08183	Multidrug resistance protein 1	ABCB1
quercetin	Q13526	Peptidyl-prolyl cis-trans isomerase NIMA-interacting 1	PIN1
quercetin	Q01453	Peripheral myelin protein 22	PMP22
quercetin	P42336	Phosphatidylinositol 4,5-bisphosphate 3-kinase catalytic subunit alpha isoform	PIK3CA
quercetin	P27986	Phosphatidylinositol 3-kinase regulatory subunit alpha	PIK3R1
quercetin	P02545	Prelamin-A/C	LMNA
quercetin	P48147	Prolyl endopeptidase	PREP
quercetin	Q15118	[Pyruvate dehydrogenase (acetyl-transferring)] kinase isozyme 1, mitochondrial	PDK1
quercetin	P49798	Regulator of G-protein signaling 4	RGS4
quercetin	RGS4	Ribosomal protein S6 kinase alpha-5	RPS6KA5
quercetin	P04745	Alpha-amylase 1	AMY1A
quercetin	P04745	Alpha-amylase 1	AMY1B
quercetin	P04745	Alpha-amylase 1	AMY1C
quercetin	P11309	Serine/threonine-protein kinase pim-1	PIM1
quercetin	O00141	Serine/threonine-protein kinase Sgk1	SGK1
quercetin	P34969	5-hydroxytryptamine receptor 7	HTR7
quercetin	Q9Y3R4	Sialidase-2	NEU2
quercetin	P42226	Signal transducer and activator of transcription 6	STAT6
quercetin	Q9Y6L6	Solute carrier organic anion transporter family member 1B1	SLCO1B1
quercetin	Q9NPD5	Solute carrier organic anion transporter family member 1B3	SLCO1B3
quercetin	SLCO1B3	Solute carrier organic anion transporter family member 2B1	SLCO2B1
quercetin	Q00796	Sorbitol dehydrogenase	SORD
quercetin	Q16637	Survival motor neuron protein	SMN1
quercetin	Q16637	Survival motor neuron protein	SMN2
quercetin	P10828	Thyroid hormone receptor beta	THRB
quercetin	P07477	Trypsin-1	PRSS1
quercetin	Q9NUW8	Tyrosyl-DNA phosphodiesterase 1	TDP1
quercetin	O94782	Ubiquitin carboxyl-terminal hydrolase 1	USP1
quercetin	O75604	Ubiquitin carboxyl-terminal hydrolase 2	USP2
quercetin	P22309	UDP-glucuronosyltransferase 1-1	UGT1A1
quercetin	Q9HAW8	UDP-glucuronosyltransferase 1-10	UGT1A10
quercetin	P19224	UDP-glucuronosyltransferase 1-6	UGT1A6
quercetin	Q9HAW9	UDP-glucuronosyltransferase 1-8	UGT1A8
quercetin	O60656	UDP-glucuronosyltransferase 1-9	UGT1A9
quercetin	P22310	UDP-glucuronosyltransferase 1-4	UGT1A4
quercetin	P54855	UDP-glucuronosyltransferase 2B15	UGT2B15
quercetin	Q06278	Aldehyde oxidase	AOX1
quercetin	P09923	Intestinal-type alkaline phosphatase	ALPI
quercetin	P14550	Alcohol dehydrogenase [NADP(+)]	AKR1A1
quercetin	P21589	5'-nucleotidase	NT5E
quercetin	Q15746	Myosin light chain kinase, smooth muscle	MYLK
quercetin	Q8N1Q1	Carbonic anhydrase 13	CA13
quercetin	P35869	Aryl hydrocarbon receptor	AHR
quercetin	P07237	Protein disulfide-isomerase	P4HB
quercetin 3-O-β-D-glucosylgalactoside	P07237	Protein disulfide-isomerase	P4HB
quercetin 3-O-β-D-glucosylgalactoside	P27986	Phosphatidylinositol 3-kinase regulatory subunit alpha	PIK3R1
quercetin 3-O-β-D-glucosylgalactoside	P09923	Intestinal-type alkaline phosphatase	ALPI
quercetin 3-O-β-D-glucosylgalactoside	P15121	Aldose reductase	AKR1B1
quercetin 3-O-β-D-glucosylgalactoside	P14550	Alcohol dehydrogenase [NADP(+)]	AKR1A1
quercetin 3-O-β-D-glucosylgalactoside	P35218	Carbonic anhydrase 5A, mitochondrial	CA5A
quercetin 3-O-β-D-glucosylgalactoside	P21589	5'-nucleotidase	NT5E
quercetin 3-O-β-D-glucosylgalactoside	Q13554	Calcium/calmodulin-dependent protein kinase type II subunit beta	CAMK2B
quercetin 3-O-β-D-glucosylgalactoside	P07451	Carbonic anhydrase 3	CA3
quercetin 3-O-β-D-glucosylgalactoside	P47989	Xanthine dehydrogenase/oxidase	XDH
quercetin 3-O-β-D-glucosylgalactoside	Q9NPH5	NADPH oxidase 4	NOX4
quercetin 3-O-β-D-glucosylgalactoside	P23280	Carbonic anhydrase 6	CA6
quercetin 3-O-β-D-glucosylgalactoside	Q16678	Cytochrome P450 1B1	CYP1B1
quercetin 3-O-β-D-glucosylgalactoside	P18054	Arachidonate 12-lipoxygenase, 12S-type	ALOX12
quercetin 3-O-β-D-glucosylgalactoside	Q04760	Lactoylglutathione lyase	GLO1
quercetin 3-O-β-D-glucosylgalactoside	P16050	Arachidonate 15-lipoxygenase	ALOX15
quercetin 3-O-β-D-glucosylgalactoside	P04798	Cytochrome P450 1A1	CYP1A1
quercetin 3-O-β-D-glucosylgalactoside	Q8N1Q1	Carbonic anhydrase 13	CA13
quercetin 3-O-β-D-glucosylgalactoside	Q9HC97	G-protein coupled receptor 35	GPR35
quercetin 3-O-β-D-glucosylgalactoside	P43166	Carbonic anhydrase 7	CA7
quercetin-3-O-[(6-O-feruloyl)-β-D-glucopyra-nosyl-(1→2)-β-D-galactopyranoside]	P15121	Aldose reductase	AKR1B1
quercetin-3-O-[(6-O-feruloyl)-β-D-glucopyra-nosyl-(1→2)-β-D-galactopyranoside]	P08684	Cytochrome P450 3A4	CYP3A4
rutin	P35368	Alpha-1B adrenergic receptor	ADRA1B
rutin	P35348	Alpha-1A adrenergic receptor	ADRA1A
rutin	P08913	Alpha-2A adrenergic receptor	ADRA2A
rutin	P18089	Alpha-2B adrenergic receptor	ADRA2B
rutin	P06276	Cholinesterase	BCHE
rutin	P22303	Acetylcholinesterase	ACHE
rutin	P35354	Prostaglandin G/H synthase 2	PTGS2
rutin	P08684	Cytochrome P450 3A4	CYP3A4
rutin	P11388	DNA topoisomerase 2-alpha	TOP2A
rutin	P21728	D(1A) dopamine receptor	DRD1
rutin	P21918	D(1B) dopamine receptor	DRD5
rutin	P03372	Estrogen receptor	ESR1
rutin	P41145	Kappa-type opioid receptor	OPRK1
rutin	P10253	Lysosomal alpha-glucosidase	GAA
rutin	Q16539	Mitogen-activated protein kinase 14	MAPK14
rutin	P33527	Multidrug resistance-associated protein 1	ABCC1
rutin	P20309	Muscarinic acetylcholine receptor M3	CHRM3
rutin	P08172	Muscarinic acetylcholine receptor M2	CHRM2
rutin	P08173	Muscarinic acetylcholine receptor M4	CHRM4
rutin	P11229	Muscarinic acetylcholine receptor M1	CHRM1
rutin	P35372	Mu-type opioid receptor	OPRM1
rutin	P08908	5-hydroxytryptamine receptor 1A	HTR1A
rutin	P28221	5-hydroxytryptamine receptor 1D	HTR1D
rutin	P46098	5-hydroxytryptamine receptor 3A	HTR3A
rutin	P50406	5-hydroxytryptamine receptor 6	HTR6
rutin	P23975	Sodium-dependent noradrenaline transporter	SLC6A2
rutin	P31645	Sodium-dependent serotonin transporter	SLC6A4
rutin	P14679	Tyrosinase	TYR
rutin	P47901	Vasopressin V1b receptor	AVPR1B
rutin	P30518	Vasopressin V2 receptor	AVPR2
rutin	P47989	Xanthine dehydrogenase/oxidase	XDH
rutin	P18825	Alpha-2C adrenergic receptor	ADRA2C
rutin	Q9UNQ0	ATP-binding cassette sub-family G member 2	ABCG2
rutin	P06746	DNA polymerase beta	POLB
rutin	Q9UBT6	DNA polymerase kappa	POLK
rutin	P27695	DNA-(apurinic or apyrimidinic site) lyase	APEX1
rutin	Q96KQ7	Histone-lysine N-methyltransferase EHMT2	EHMT2
rutin	B2RXH2	Lysine-specific demethylase 4E	KDM4E
rutin	P10636	Microtubule-associated protein tau	MAPT
rutin	P28482	Mitogen-activated protein kinase 1	MAPK1
rutin	Q9NR56	Muscleblind-like protein 1	MBNL1
rutin	Q86UN1	Uncharacterized protein HTR5A	HTR5A
rutin	Q6NUM3	Muscarinic acetylcholine receptor	CHRM5
rutin	P34969	5-hydroxytryptamine receptor 7	HTR7
rutin	P07237	Protein disulfide-isomerase	P4HB
rutin	P27986	Phosphatidylinositol 3-kinase regulatory subunit alpha	PIK3R1
rutin	P09923	Intestinal-type alkaline phosphatase	ALPI
rutin	P15121	Aldose reductase	AKR1B1
rutin	P51812	Ribosomal protein S6 kinase alpha-3	RPS6KA3
rutin	P14550	Alcohol dehydrogenase [NADP(+)]	AKR1A1
rutin	Q13627	Dual specificity tyrosine-phosphorylation-regulated kinase 1A	DYRK1A
rutin	P35218	Carbonic anhydrase 5A, mitochondrial	CA5A
rutin	P21589	5'-nucleotidase	NT5E
rutin	Q13554	Calcium/calmodulin-dependent protein kinase type II subunit beta	CAMK2B
rutin	P07451	Carbonic anhydrase 3	CA3
rutin	P47989	Xanthine dehydrogenase/oxidase	XDH
rutin	Q9NPH5	NADPH oxidase 4	NOX4
rutin	P23280	Carbonic anhydrase 6	CA6
rutin	Q16678	Cytochrome P450 1B1	CYP1B1
rutin	P18054	Arachidonate 12-lipoxygenase, 12S-type	ALOX12
rutin	Q04760	Lactoylglutathione lyase	GLO1
rutin	P16050	Arachidonate 15-lipoxygenase	ALOX15
rutin	P04798	Cytochrome P450 1A1	CYP1A1
rutin	Q8N1Q1	Carbonic anhydrase 13	CA13
scopoletol	P15121	Aldose reductase	AKR1B1
scopoletol	P06280	Alpha-galactosidase A	GLA
scopoletol	P09917	Arachidonate 5-lipoxygenase	ALOX5
scopoletol	P04062	Glucosylceramidase	GBA
scopoletol	P00918	Carbonic anhydrase 2	CA2
scopoletol	P22303	Acetylcholinesterase	ACHE
scopoletol	P35354	Prostaglandin G/H synthase 2	PTGS2
scopoletol	P10635	Cytochrome P450 2D6	CYP2D6
scopoletol	P08684	Cytochrome P450 3A4	CYP3A4
scopoletol	Q16665	Hypoxia-inducible factor 1-alpha	HIF1A
scopoletol	P10253	Lysosomal alpha-glucosidase	GAA
scopoletol	P18031	Tyrosine-protein phosphatase non-receptor type 1	PTPN1
scopoletol	P47989	Xanthine dehydrogenase/oxidase	XDH
scopoletol	P15428	15-hydroxyprostaglandin dehydrogenase [NAD(+)]	HPGD
scopoletol	P00352	Retinal dehydrogenase 1	ALDH1A1
scopoletol	Q99700	Ataxin-2	ATXN2
scopoletol	P46063	ATP-dependent DNA helicase Q1	RECQL
scopoletol	P00915	Carbonic anhydrase 1	CA1
scopoletol	P43166	Carbonic anhydrase 7	CA7
scopoletol	O43570	Carbonic anhydrase 12	CA12
scopoletol	Q8N1Q1	Carbonic anhydrase 13	CA13
scopoletol	Q16790	Carbonic anhydrase 9	CA9
scopoletol	P29466	Caspase-1	CASP1
scopoletol	P55210	Caspase-7	CASP7
scopoletol	P05177	Cytochrome P450 1A2	CYP1A2
scopoletol	P33261	Cytochrome P450 2C19	CYP2C19
scopoletol	P11712	Cytochrome P450 2C9	CYP2C9
scopoletol	Q99714	3-hydroxyacyl-CoA dehydrogenase type-2	HSD17B10
scopoletol	P55789	FAD-linked sulfhydryl oxidase ALR	GFER
scopoletol	O75496	Geminin	GMNN
scopoletol	P04406	Glyceraldehyde-3-phosphate dehydrogenase	GAPDH
scopoletol	P63092	Guanine nucleotide-binding protein G(s) subunit alpha isoforms short	GNAS
scopoletol	Q92830	Histone acetyltransferase KAT2A	KAT2A
scopoletol	Q03164	Histone-lysine N-methyltransferase 2A	KMT2A
scopoletol	Q96KQ7	Histone-lysine N-methyltransferase EHMT2	EHMT2
scopoletol	B2RXH2	Lysine-specific demethylase 4E	KDM4E
scopoletol	Q04206	Transcription factor p65	RELA
scopoletol	Q13526	Peptidyl-prolyl cis-trans isomerase NIMA-interacting 1	PIN1
scopoletol	Q00796	Sorbitol dehydrogenase	SORD
scopoletol	P22309	UDP-glucuronosyltransferase 1-1	UGT1A1
scopoletol	Q9HAW8	UDP-glucuronosyltransferase 1-10	UGT1A10
scopoletol	Q9HAW9	UDP-glucuronosyltransferase 1-8	UGT1A8
scopoletol	O60656	UDP-glucuronosyltransferase 1-9	UGT1A9
scopoletol	P22310	UDP-glucuronosyltransferase 1-4	UGT1A4
scopoletol	Q9Y4X1	UDP-glucuronosyltransferase 2A1	UGT2A1
scopoletol	P54855	UDP-glucuronosyltransferase 2B15	UGT2B15
scopoletol	O75795	UDP-glucuronosyltransferase 2B17	UGT2B17
scopoletol	Q8N1Q1	Carbonic anhydrase 13	CA13
scopoletol	P43166	Carbonic anhydrase 7	CA7
scopoletol	O43570	Carbonic anhydrase 12	CA12
scopoletol	P07451	Carbonic anhydrase 3	CA3
scopoletol	P23280	Carbonic anhydrase 6	CA6
scopoletol	Q16790	Carbonic anhydrase 9	CA9
scopoletol	P06401	Progesterone receptor	PGR
scopoletol	Q9Y5X4	Photoreceptor-specific nuclear receptor	NR2E3
scopoletol	Q9NR96	Toll-like receptor 9	TLR9
scopoletol	Q9Y618	Nuclear receptor corepressor 2	NCOR2
scopoletol	Q9ULX7	Carbonic anhydrase 14	CA14
scopoletol	P00915	Carbonic anhydrase 1	CA1
scopoletol	P00918	Carbonic anhydrase 2	CA2
scopoletol	P27338	Amine oxidase [flavin-containing] B	MAOB
sitogluside	P49841	Glycogen synthase kinase-3 beta	GSK3B
sitogluside	P18031	Tyrosine-protein phosphatase non-receptor type 1	PTPN1
sitogluside	P00734	Prothrombin	F2
sitogluside	P06746	DNA polymerase beta	POLB
sitogluside	P08047	Transcription factor Sp1	SP1
sitogluside	Q13133	Oxysterols receptor LXR-alpha	NR1H3
sitosteryl glucoside	Q13133	Oxysterols receptor LXR-alpha	NR1H3
stigmasterol	P05093	Steroid 17-alpha-hydroxylase/17,20 lyase	CYP17A1
stigmasterol	Q9UBM7	7-dehydrocholesterol reductase	DHCR7
stigmasterol	Q15125	3-beta-hydroxysteroid-Delta(8),Delta(7)-isomerase	EBP
stigmasterol	Q13133	Oxysterols receptor LXR-alpha	NR1H3
stigmasterol	P11413	Glucose-6-phosphate 1-dehydrogenase	G6PD
stigmasterol	Q15465	Sonic hedgehog protein	SHH
stigmasterol	Q8TDU6	G-protein coupled bile acid receptor 1	GPBAR1
stigmasterol	P24557	Thromboxane-A synthase	TBXAS1
stigmasterol	P10635	Cytochrome P450 2D6	CYP2D6
stigmasteryl β-D-glucoside	Q13133	Oxysterols receptor LXR-alpha	NR1H3
succinic acid	Q00987	E3 ubiquitin-protein ligase Mdm2	MDM2
succinic acid	Q9GZT9	Egl nine homolog 1	EGLN1
succinic acid	Q7Z4W1	L-xylulose reductase	DCXR
succinic acid	B2RXH2	Lysine-specific demethylase 4E	KDM4E
succinic acid	P20933	N(4)-(beta-N-acetylglucosaminyl)-L-asparaginase	AGA
succinic acid	Q16798	NADP-dependent malic enzyme, mitochondrial	ME3
succinic acid	P02545	Prelamin-A/C	LMNA
succinic acid	Q8TCC7	Solute carrier family 22 member 8	SLC22A8
succinic acid	P22748	Carbonic anhydrase 4	CA4
trans-4-methoxycinnamyl alcohol	P10636	Microtubule-associated protein tau	MAPT
trans-4-methoxycinnamyl alcohol	P68363	Tubulin alpha-1B chain	TUBA1B
trans-4-methoxycinnamyl alcohol	P11509	Cytochrome P450 2A6	CYP2A6
trans-4-methoxycinnamyl alcohol	Q16678	Cytochrome P450 1B1	CYP1B1
trans-4-methoxycinnamyl alcohol	P35869	Aryl hydrocarbon receptor	AHR
trans-4-methoxycinnamyl alcohol	Q9H4B7	Tubulin beta-1 chain	TUBB1
trans-4-methoxycinnamyl alcohol	P43166	Carbonic anhydrase 7	CA7
trans-4-methoxycinnamyl alcohol	Q9ULX7	Carbonic anhydrase 14	CA14
trans-4-methoxycinnamyl alcohol	P39086	Glutamate receptor ionotropic, kainate 1	GRIK1
trans-4-methoxycinnamyl alcohol	P23219	Prostaglandin G/H synthase 1	PTGS1
trans-4-methoxycinnamyl alcohol	O43570	Carbonic anhydrase 12	CA12
trans-4-methoxycinnamyl alcohol	Q16790	Carbonic anhydrase 9	CA9
trans-4-methoxycinnamyl alcohol	P03372	Estrogen receptor	ESR1
trans-4-methoxycinnamyl alcohol	P09917	Arachidonate 5-lipoxygenase	ALOX5
trans-4-methoxycinnamyl alcohol	P00915	Carbonic anhydrase 1	CA1
trans-4-methoxycinnamyl alcohol	P35354	Prostaglandin G/H synthase 2	PTGS2
trans-4-methoxycinnamyl alcohol	P00918	Carbonic anhydrase 2	CA2
ursolic acid	P28845	Corticosteroid 11-beta-dehydrogenase isozyme 1	HSD11B1
ursolic acid	P15121	Aldose reductase	AKR1B1
ursolic acid	Q96RI1	Bile acid receptor	NR1H4
ursolic acid	P23219	Prostaglandin G/H synthase 1	PTGS1
ursolic acid	P35354	Prostaglandin G/H synthase 2	PTGS2
ursolic acid	P11511	Aromatase	CYP19A1
ursolic acid	Q8TDU6	G-protein coupled bile acid receptor 1	GPBAR1
ursolic acid	P49841	Glycogen synthase kinase-3 beta	GSK3B
ursolic acid	Q13547	Histone deacetylase 1	HDAC1
ursolic acid	P56524	Histone deacetylase 4	HDAC4
ursolic acid	Q07869	Peroxisome proliferator-activated receptor alpha	PPARA
ursolic acid	P14555	Phospholipase A2, membrane associated	PLA2G2A
ursolic acid	P18031	Tyrosine-protein phosphatase non-receptor type 1	PTPN1
ursolic acid	P29350	Tyrosine-protein phosphatase non-receptor type 6	PTPN6
ursolic acid	P80365	Corticosteroid 11-beta-dehydrogenase isozyme 2	HSD11B2
ursolic acid	O60218	Aldo-keto reductase family 1 member B10	AKR1B10
ursolic acid	P46063	ATP-dependent DNA helicase Q1	RECQL
ursolic acid	P83916	Chromobox protein homolog 1	CBX1
ursolic acid	P06746	DNA polymerase beta	POLB
ursolic acid	P27695	DNA-(apurinic or apyrimidinic site) lyase	APEX1
ursolic acid	P30305	M-phase inducer phosphatase 2	CDC25B
ursolic acid	O94925	Glutaminase kidney isoform, mitochondrial	GLS
ursolic acid	Q9UNK4	Group IID secretory phospholipase A2	PLA2G2D
ursolic acid	Q9NZK7	Group IIE secretory phospholipase A2	PLA2G2E
ursolic acid	Q9BZM2	Group IIF secretory phospholipase A2	PLA2G2F
ursolic acid	Q92830	Histone acetyltransferase KAT2A	KAT2A
ursolic acid	O15379	Histone deacetylase 3	HDAC3
ursolic acid	Q9UQL6	Histone deacetylase 5	HDAC5
ursolic acid	Q9UBN7	Histone deacetylase 6	HDAC6
ursolic acid	Q03164	Histone-lysine N-methyltransferase 2A	KMT2A
ursolic acid	O75874	Isocitrate dehydrogenase [NADP] cytoplasmic	IDH1
ursolic acid	P24666	Low molecular weight phosphotyrosine protein phosphatase	ACP1
ursolic acid	P19838	Nuclear factor NF-kappa-B p105 subunit	NFKB1
ursolic acid	Q04206	Transcription factor p65	RELA
ursolic acid	P18433	Receptor-type tyrosine-protein phosphatase alpha	PTPRA
ursolic acid	P23469	Receptor-type tyrosine-protein phosphatase epsilon	PTPRE
ursolic acid	P10586	Receptor-type tyrosine-protein phosphatase F	PTPRF
ursolic acid	P17706	Tyrosine-protein phosphatase non-receptor type 2	PTPN2
ursolic acid	P08047	Transcription factor Sp1	SP1
ursolic acid	P11217	Glycogen phosphorylase, muscle form	PYGM
β-sitosterol	P10635	Cytochrome P450 2D6	CYP2D6
β-sitosterol	P08684	Cytochrome P450 3A4	CYP3A4
β-sitosterol	P03372	Estrogen receptor	ESR1
β-sitosterol	P49841	Glycogen synthase kinase-3 beta	GSK3B
β-sitosterol	P18031	Tyrosine-protein phosphatase non-receptor type 1	PTPN1
β-sitosterol	P00734	Prothrombin	F2
β-sitosterol	P14679	Tyrosinase	TYR
β-sitosterol	P80365	Corticosteroid 11-beta-dehydrogenase isozyme 2	HSD11B2
β-sitosterol	P06746	DNA polymerase beta	POLB
β-sitosterol	P08183	Multidrug resistance protein 1	ABCB1
β-sitosterol	P08047	Transcription factor Sp1	SP1
β-sitosterol	P05093	Steroid 17-alpha-hydroxylase/17,20 lyase	CYP17A1
β-sitosterol	Q9UBM7	7-dehydrocholesterol reductase	DHCR7
β-sitosterol	Q15125	3-beta-hydroxysteroid-Delta(8),Delta(7)-isomerase	EBP
β-sitosterol	Q13133	Oxysterols receptor LXR-alpha	NR1H3
β-sitosterol	P11413	Glucose-6-phosphate 1-dehydrogenase	G6PD
β-sitosterol	Q15465	Sonic hedgehog protein	SHH
β-sitosterol	Q8TDU6	G-protein coupled bile acid receptor 1	GPBAR1
β-sitosterol	P24557	Thromboxane-A synthase	TBXAS1
