# Supplementary material for: Network Pharmacology-Based Approach to Investigate the Mechanisms of Hedyotis diffusa Willd. in the Treatment of Gastric Cancer
Source: Evid Based Complement Alternat Med. 2018 May 2;2018:7802639. doi: 10.1155/2018/7802639 (PMC5954954; doi:10.1155/2018/7802639)
Supplement: Supplementary 4 — Table S4: known gastric cancer-related targets. [file 7802639.f4.xlsx]

## Sheet: Sheet1
Table S4 Known gastric cancer-related targets.
ABCB1
AEN
APC
BAX
BCL2
BRCA1
CASP10
CD55
CDA
CDH1
CTNNB1
CYP2A6
CYP3A4
CYP3A5
DPYD
EGFR
ENOSF1
ERBB2
ERCC1
ERCC2
FGFR2
FLT1
FLT4
GAST
GCKR
GPR119
GSTM1
GSTP1
GSTT1
HSP90AA1
IGF2BP2
IGFBP3
IL1B
IL1RN
IL8
IRF1
KCNQ1
KDR
KLF6
KRAS
MAPK1
MET
MTHFR
MUC2
MUTYH
NOS3
NQO1
PCNA
PIK3CA
PON1
PTGS2
RRM2
S100A8
SCN1A
SOD2
SOD3
SPARC
TCEAL1
TOP1
TOP2A
TP53
TYMP
TYMS
VEGFA
XRCC1
XRCC3
