# Supplementary material for: Network Pharmacology-Based Approach to Investigate the Mechanisms of Hedyotis diffusa Willd. in the Treatment of Gastric Cancer
Source: Evid Based Complement Alternat Med. 2018 May 2;2018:7802639. doi: 10.1155/2018/7802639 (PMC5954954; doi:10.1155/2018/7802639)
Supplement: Supplementary 5 — Table S5: topological features of all nodes in the compound-compound target network. [file 7802639.f5.xlsx]

## Sheet: Sheet1
Table S5 Topological features of all nodes in the compound-compound target network.
Name	Degree	Betweenness centrality	Closeness centrality
quercetin	203	0.59395	0.517615
coumarin	123	0.349181	0.432127
rutin	64	0.050504	0.370874
scopoletol	61	0.0919371	0.367308
ursolic acid	40	0.115456	0.347273
p-coumaric acid	30	0.0484061	0.342908
ferulic acid	24	0.0444303	0.317804
quercetin 3-O-β-D-glucosylgalactoside	20	0.00414544	0.324278
β-sitosterol	19	0.0400189	0.333916
trans-4-methoxycinnamyl alcohol	17	0.00767868	0.326496
4-methoxycinnamic acid	17	0.0106773	0.308065
3-(4-Methoxyphenyl)-2-propen-1-ol	17	0.00767868	0.326496
2-hydroxy-3-methylanthraquinone	14	0.0418884	0.323729
CA7	10	0.0128622	0.426816
succinic acid	9	0.031254	0.299373
stigmasterol	9	0.00559047	0.311075
poriferasterol	9	0.00559047	0.311075
hentriacontane	9	0.0371905	0.240554
3-epioleanolic acid	9	0.00831318	0.317276
AKR1B1	9	0.0263727	0.4406
CA9	9	0.0119351	0.424917
CA12	9	0.0119351	0.424917
panasenoside	8	0.00532227	0.325939
PTGS2	8	0.0225193	0.441619
CYP3A4	8	0.0279748	0.428732
CA3	8	0.0124893	0.425864
CA6	8	0.0124893	0.425864
PTPN1	8	0.028029	0.3926
CA14	8	0.0119351	0.424917
CA13	7	0.00680155	0.413868
CYP2D6	7	0.0249572	0.418401
CA5A	7	0.00960492	0.413868
POLB	7	0.0221244	0.383149
CA2	7	0.00676256	0.413868
CA1	7	0.00676256	0.413868
ESR1	7	0.012922	0.416576
sitogluside	6	0.00405022	0.287651
oleanolic acid-28-O-β-D-glucopyranoside	6	0.0153882	0.31675
NR1H3	6	0.0106435	0.252145
CYP1B1	6	0.00208738	0.350781
MAPT	6	0.00403014	0.356676
XDH	5	0.00132158	0.356011
CA5B	5	0.00751172	0.409432
ALOX5	5	0.00390186	0.363463
PTGS1	5	0.013942	0.416576
CYP2A6	4	0.00107419	0.308313
EGFR	4	0.0136474	0.398332
KDM4E	4	0.0124469	0.360038
GSK3B	4	0.00895829	0.36837
GPBAR1	4	0.00212056	0.26436
APEX1	4	0.00750642	0.369797
TYR	4	0.00518493	0.360038
ALPI	4	0.00121535	0.346957
P4HB	4	0.00121535	0.346957
GLO1	4	0.0024117	0.352074
MAOB	4	0.00656614	0.410311
CA4	4	0.016298	0.402529
TBXAS1	4	0.00656985	0.312858
ACHE	4	0.00403951	0.404233
AKR1B10	4	0.00251228	0.276211
TUBB1	4	0.00025751	0.257239
AHR	4	0.00131634	0.346957
CYP2C9	4	0.0132615	0.411195
CYP2C19	4	0.0132615	0.411195
oleanolic acid	3	0.00035608	0.286787
digitolutein	3	0.0009205	0.203625
2-methyl-3-methoxyanthraquinone	3	0.000376	0.214607
HSP90AA1	3	0.00414986	0.246611
MAPK1	3	0.00225206	0.3926
BCL2	3	0.00297672	0.24886
SP1	3	0.00079703	0.263994
NT5E	3	0.0002802	0.345077
AKR1A1	3	0.0002802	0.345077
PIK3R1	3	0.0002802	0.345077
NOX4	3	0.0002802	0.345077
EHMT2	3	0.00104427	0.355349
KMT2A	3	0.00582754	0.371234
CYP1A1	3	0.0002802	0.345077
RECQL	3	0.00582754	0.371234
ALOX15	3	0.0002802	0.345077
ALOX12	3	0.0002802	0.345077
SHH	3	5.866e-05	0.251151
G6PD	3	5.866e-05	0.251151
EBP	3	5.866e-05	0.251151
DHCR7	3	5.866e-05	0.251151
CYP17A1	3	5.866e-05	0.251151
DYRK1A	3	0.00085575	0.280676
SORD	3	0.00324402	0.400839
LMNA	3	0.0130876	0.394221
MBNL1	3	0.00225206	0.3926
CYP1A2	3	0.00324402	0.400839
ADRA2C	3	0.00225206	0.3926
AVPR1A	3	0.0422595	0.310317
SLC6A4	3	0.00225206	0.3926
SLC6A2	3	0.00225206	0.3926
HTR6	3	0.00225206	0.3926
OPRM1	3	0.00225206	0.3926
CHRM1	3	0.00225206	0.3926
CHRM5	3	0.00225206	0.3926
CHRM4	3	0.00225206	0.3926
CHRM2	3	0.00225206	0.3926
CHRM3	3	0.00225206	0.3926
MAOA	3	0.00454016	0.398332
MMP9	3	0.00320368	0.396677
MMP1	3	0.00320368	0.396677
MAPK14	3	0.00225206	0.3926
OPRK1	3	0.00225206	0.3926
DRD1	3	0.00225206	0.3926
ADRA2B	3	0.00225206	0.3926
ADRA2A	3	0.00225206	0.3926
CBX1	3	0.00916111	0.360718
ELANE	3	0.0104575	0.302934
ABCG2	3	0.00082583	0.348222
HSD11B1	3	0.00611565	0.3614
NR1H4	3	0.00848074	0.324003
PYGM	3	0.00034233	0.258983
PTPN2	3	0.00131534	0.263267
TUBA1B	3	3.211e-05	0.249185
RELA	3	0.00407481	0.287867
CDC25B	3	0.00493785	0.266202
MCL1	3	0.0017756	0.251151
quercetin-3-O-[(6-O-feruloyl)-β-D-glucopyra-nosyl-(1→2)-β-D-galactopyranoside]	2	2.672e-05	0.316225
2,3-dimethoxy-6-methyanthraquinone	2	0.0052356	0.285501
ABCB1	2	0.00235293	0.350137
TOP2A	2	0.00011731	0.344454
HSD11B2	2	0.00049792	0.26363
F2	2	3.992e-05	0.250821
KAT2A	2	0.0011952	0.283173
GAA	2	0.00022013	0.290494
CAMK2B	2	2.144e-05	0.271886
UGT2B15	2	0.00070683	0.352724
UGT1A4	2	0.00070683	0.352724
UGT1A9	2	0.00070683	0.352724
UGT1A8	2	0.00070683	0.352724
UGT1A10	2	0.00070683	0.352724
UGT1A1	2	0.00070683	0.352724
HTR7	2	0.00011731	0.344454
PIN1	2	0.00070683	0.352724
NFKB1	2	0.00392551	0.360038
HTR5A	2	0.00011731	0.344454
GPR35	2	0.00014146	0.342601
HSD17B10	2	0.00070683	0.352724
POLK	2	0.00011731	0.344454
ALDH1A1	2	0.00070683	0.352724
HPGD	2	0.00070683	0.352724
AVPR2	2	0.00011731	0.344454
AVPR1B	2	0.00011731	0.344454
HTR3A	2	0.00011731	0.344454
HTR1D	2	0.00011731	0.344454
HTR1A	2	0.00011731	0.344454
ABCC1	2	0.00011731	0.344454
HIF1A	2	0.00070683	0.352724
DRD5	2	0.00011731	0.344454
CYP19A1	2	0.00392551	0.360038
BCHE	2	0.00011731	0.344454
GBA	2	0.00070683	0.352724
ADRA1A	2	0.00011731	0.344454
ADRA1B	2	0.00011731	0.344454
MMP2	2	0.00086123	0.347589
RPS6KA3	2	0.00013205	0.273052
GFER	2	0.00045867	0.275018
PGR	2	0.00086048	0.320201
USP1	2	0.0016767	0.388606
TDP1	2	0.0016767	0.388606
PRSS1	2	0.0016767	0.388606
THRB	2	0.0016767	0.388606
SLCO2B1	2	0.0016767	0.388606
SLCO1B3	2	0.0016767	0.388606
SLCO1B1	2	0.0016767	0.388606
MAPK3	2	0.0016767	0.388606
GAPDH	2	0.00086048	0.320201
POLI	2	0.0016767	0.388606
CASP1	2	0.00086048	0.320201
CTRB1	2	0.0016767	0.388606
LCK	2	0.0016767	0.388606
PRKCA	2	0.0016767	0.388606
PDE5A	2	0.0016767	0.388606
CXCR1	2	0.0016767	0.388606
NR3C1	2	0.0016767	0.388606
DRD4	2	0.0016767	0.388606
CCR4	2	0.0016767	0.388606
BACE1	2	0.0016767	0.388606
AR	2	0.0016767	0.388606
ADORA3	2	0.0016767	0.388606
EPAS1	2	7.952e-05	0.258632
PTPN6	2	0.00012215	0.258632
GRIK1	2	8.1e-07	0.246611
PLA2G1B	2	0.00502084	0.349497
SENP7	2	0.00209842	0.248536
ATG4B	2	0.00161427	0.257934
stigmasteryl β-D-glucoside	1	0	0.201477
sitosteryl glucoside	1	0	0.201477
genipin	1	0	1
E-6-O-p-methoxycinnamoyl scandoside methyl ester	1	0	0.232643
asperuloside	1	0	0.265278
6-O-Z-p-coumaroyl scandoside methyl ester	1	0	0.232643
PIK3CA	1	0	0.341376
TP53	1	0	0.341376
TOP1	1	0	0.341376
FLT1	1	0	0.301976
ERBB2	1	0	0.301976
PTPRF	1	0	0.257934
PTPRE	1	0	0.257934
PTPRA	1	0	0.257934
ACP1	1	0	0.257934
IDH1	1	0	0.257934
HDAC6	1	0	0.257934
HDAC5	1	0	0.257934
HDAC3	1	0	0.257934
PLA2G2F	1	0	0.257934
PLA2G2E	1	0	0.257934
PLA2G2D	1	0	0.257934
GLS	1	0	0.257934
PLA2G2A	1	0	0.257934
PPARA	1	0	0.257934
HDAC4	1	0	0.257934
HDAC1	1	0	0.257934
SLC22A8	1	0	0.230537
ME3	1	0	0.230537
AGA	1	0	0.230537
DCXR	1	0	0.230537
EGLN1	1	0	0.230537
MDM2	1	0	0.230537
NCOR2	1	0	0.268825
TLR9	1	0	0.268825
NR2E3	1	0	0.268825
UGT2B17	1	0	0.268825
UGT2A1	1	0	0.268825
GNAS	1	0	0.268825
GMNN	1	0	0.268825
CASP7	1	0	0.268825
ATXN2	1	0	0.268825
GLA	1	0	0.268825
MYLK	1	0	0.341376
AOX1	1	0	0.341376
UGT1A6	1	0	0.341376
USP2	1	0	0.341376
SMN2	1	0	0.341376
SMN1	1	0	0.341376
STAT6	1	0	0.341376
NEU2	1	0	0.341376
SGK1	1	0	0.341376
PIM1	1	0	0.341376
AMY1C	1	0	0.341376
AMY1B	1	0	0.341376
AMY1A	1	0	0.341376
RPS6KA5	1	0	0.341376
RGS4	1	0	0.341376
PDK1	1	0	0.341376
PREP	1	0	0.341376
PMP22	1	0	0.341376
NPSR1	1	0	0.341376
SMAD3	1	0	0.341376
MAPKAPK5	1	0	0.341376
MAPKAPK2	1	0	0.341376
MAPK11	1	0	0.341376
MAPK13	1	0	0.341376
MPHOSPH8	1	0	0.341376
KARS	1	0	0.341376
CD38	1	0	0.341376
HIF1AN	1	0	0.341376
HSP90AB1	1	0	0.341376
HSF1	1	0	0.341376
GSR	1	0	0.341376
GALK1	1	0	0.341376
FEN1	1	0	0.341376
HSD17B2	1	0	0.341376
HSD17B1	1	0	0.341376
POLH	1	0	0.341376
CYP2C8	1	0	0.341376
CDK5	1	0	0.341376
CCNB1	1	0	0.341376
CCNB2	1	0	0.341376
MMP13	1	0	0.341376
CTRC	1	0	0.341376
CSNK2A1	1	0	0.341376
CBR3	1	0	0.341376
CBR1	1	0	0.341376
ABCC2	1	0	0.341376
Q13554	1	0	0.341376
CALM1	1	0	0.341376
MAPK10	1	0	0.341376
MAPK9	1	0	0.341376
BLM	1	0	0.341376
GUSB	1	0	0.341376
ATAD5	1	0	0.341376
ALOX15B	1	0	0.341376
HSPA5	1	0	0.341376
SRC	1	0	0.341376
FLT3	1	0	0.341376
TSHR	1	0	0.341376
PLK1	1	0	0.341376
CHEK1	1	0	0.341376
AKT1	1	0	0.341376
RPS6KB1	1	0	0.341376
PPARG	1	0	0.341376
MPO	1	0	0.341376
MMP12	1	0	0.341376
MMP3	1	0	0.341376
MAPK12	1	0	0.341376
HSPB1	1	0	0.341376
TOP2B	1	0	0.341376
DPP4	1	0	0.341376
CDK4	1	0	0.341376
CDK2	1	0	0.341376
CDK1	1	0	0.341376
CDK6	1	0	0.341376
MAPK8	1	0	0.341376
PTPRB	1	0	0.255518
AKR1C3	1	0	0.255518
AKR1C4	1	0	0.255518
AKR1C2	1	0	0.255518
AKR1C1	1	0	0.255518
PLA2G7	1	0	0.255518
HCAR2	1	0	0.255518
OXTR	1	0	0.240706
RAD52	1	0	0.194007
NAAA	1	0	0.194007
SLC22A2	1	0	0.194007
CES1	1	0	0.194007
CES2	1	0	0.194007
DNM1	1	0	0.194007
SLC22A1	1	0	0.194007
CD81	1	0	1
SGK2	1	0	0.241314
TRPV4	1	0	0.241314
TRPV2	1	0	0.241314
BRSK1	1	0	0.241314
APP	1	0	0.241314
ODC1	1	0	0.241314
TUBB2B	1	0	0.241314
PPP3CA	1	0	0.301976
RUNX1	1	0	0.301976
NFE2L2	1	0	0.301976
MC5R	1	0	0.301976
PTPRC	1	0	0.301976
XPO1	1	0	0.301976
CYP2E1	1	0	0.301976
VIPR1	1	0	0.301976
FYN	1	0	0.301976
SIGMAR1	1	0	0.301976
ALB	1	0	0.301976
HTR2B	1	0	0.301976
HTR2A	1	0	0.301976
HTR2C	1	0	0.301976
PTAFR	1	0	0.301976
OPRD1	1	0	0.301976
NPY2R	1	0	0.301976
NPY1R	1	0	0.301976
TACR2	1	0	0.301976
TACR1	1	0	0.301976
SLC6A3	1	0	0.301976
MC4R	1	0	0.301976
MC3R	1	0	0.301976
CXCR2	1	0	0.301976
HMGCR	1	0	0.301976
HRH2	1	0	0.301976
HRH1	1	0	0.301976
KCNH2	1	0	0.301976
ESR2	1	0	0.301976
EDNRA	1	0	0.301976
DRD3	1	0	0.301976
DRD2	1	0	0.301976
CYSLTR1	1	0	0.301976
CCKAR	1	0	0.301976
CTSG	1	0	0.301976
CNR1	1	0	0.301976
CALCR	1	0	0.301976
CCR5	1	0	0.301976
CCR2	1	0	0.301976
BDKRB2	1	0	0.301976
ADRB2	1	0	0.301976
AGTR2	1	0	0.301976
ADRB3	1	0	0.301976
ADRB1	1	0	0.301976
ADRA1D	1	0	0.301976
ADORA1	1	0	0.301976
ADORA2A	1	0	0.301976
TLR4	1	0	0.235657
BCL2L1	1	0	0.241009
CASP3	1	0	0.244715
NFKB2	1	0	0.244715
SENP8	1	0	0.244715
SENP6	1	0	0.244715
MITF	1	0	0.222222
