# Supplementary material for: Network Pharmacology-Based Approach to Investigate the Mechanisms of Hedyotis diffusa Willd. in the Treatment of Gastric Cancer
Source: Evid Based Complement Alternat Med. 2018 May 2;2018:7802639. doi: 10.1155/2018/7802639 (PMC5954954; doi:10.1155/2018/7802639)
Supplement: Supplementary 6 — Table S6: topological features of all nodes in the PPI network of compound target. [file 7802639.f6.xlsx]

## Sheet: Sheet1
Table S6 Topological features of all nodes in the PPI network of compound target.
Name	Degree	Betweenness centrality	Closeness centrality
TP53	106	0.139469	0.519846
PIK3CA	85	0.055244	0.483909
CDK2	79	0.0296088	0.445664
MAPK1	76	0.0398392	0.478774
PCNA	74	0.0395203	0.428722
CDK1	73	0.0160794	0.424242
APP	72	0.0833771	0.451613
AKT1	71	0.0263413	0.466131
JUN	65	0.0370089	0.479339
CCNB1	63	0.00845031	0.409687
HSP90AA1	62	0.0347495	0.453125
SRC	62	0.0266994	0.457207
EGF	60	0.0340849	0.47541
EGFR	58	0.0273782	0.476526
CCNA2	58	0.00460439	0.395326
MAPK3	57	0.0175705	0.464
PIK3CG	57	0.00948533	0.453631
PIK3CB	54	0.00537431	0.438445
MAPK8	53	0.0098385	0.459796
PIK3R1	53	0.0142239	0.421162
NFKB1	53	0.0180846	0.452116
FOS	53	0.0183097	0.458757
BDKRB2	52	0.0244459	0.408862
PIK3CD	52	0.00472862	0.4375
CDKN1B	52	0.0137198	0.42029
GAPDH	51	0.045586	0.472093
RFC4	51	0.00546122	0.383743
CCND1	51	0.00532403	0.433761
CDK4	50	0.00682614	0.415133
VEGFA	50	0.0131299	0.464531
RB1	50	0.0151511	0.426919
BCL2	49	0.00606801	0.446154
MAPK14	49	0.00635386	0.434225
CHEK1	48	0.00422489	0.393792
CDC6	48	0.0016207	0.363148
RPA1	48	0.0116502	0.388517
MTOR	47	0.00702172	0.431456
ESR1	46	0.0201288	0.459276
MCM2	46	0.00152312	0.347009
CCNA1	46	0.00219525	0.382298
PTGS2	45	0.0456454	0.440825
MCM4	45	0.00163606	0.346121
TOP2A	43	0.0048646	0.39001
MCM7	43	0.00146183	0.347603
CDK3	43	0.00208097	0.372477
RAD51	43	0.00919285	0.379794
CCNB2	42	0.00075877	0.351515
RELA	42	0.0119135	0.426919
NPSR1	42	0.0159425	0.372136
CDC20	42	0.00289104	0.38015
MCM3	42	0.00180747	0.347009
CDC45	42	0.00082684	0.342616
CASP3	41	0.0111618	0.443231
FEN1	40	0.00132793	0.340033
ALB	40	0.0291819	0.438919
MCM5	40	0.00103549	0.343486
MCM6	40	0.00101093	0.344068
CYP3A4	38	0.0125132	0.345532
F2	38	0.00857094	0.405594
RFC3	38	0.00341321	0.378026
MAD2L1	38	0.0043474	0.336371
CDK6	37	0.00311944	0.392271
RFC5	37	0.00322113	0.377323
ATR	37	0.00179647	0.374885
AR	36	0.0183263	0.43609
CDK5	35	0.0108362	0.423358
SP1	35	0.0192805	0.422917
PLK1	34	0.00338672	0.387405
CHRM2	34	0.00785688	0.375578
NOS3	34	0.0113707	0.435155
ORC1	34	0.00033058	0.351211
BUB1	34	0.00138388	0.374885
BLM	33	0.00176833	0.372477
HIF1A	33	0.0243986	0.425131
HDAC1	33	0.00712714	0.401583
CYP2E1	33	0.0210004	0.343776
CCR5	33	0.00451964	0.367421
CHRM1	33	0.013855	0.387775
FOXO1	33	0.00452665	0.403579
FYN	32	0.00329749	0.395326
CYP1A1	32	0.0367872	0.389262
CDT1	32	0.0001171	0.33665
POLD1	32	0.00389255	0.322222
MAPK11	31	0.00201698	0.4
EDNRA	31	0.00401514	0.383381
AGTR2	31	0.00204224	0.346416
ORC2	31	0.00017387	0.346712
BCL2L1	30	0.00119169	0.408451
MDM2	30	0.00985738	0.407631
MMP9	30	0.0171548	0.407222
UGT1A6	30	0.0218225	0.363799
GNAS	30	0.0122746	0.375926
TACR1	30	0.00109421	0.372819
RFC2	30	0.00229032	0.369091
ERBB2	29	0.00303738	0.415984
CALM1	29	0.0147089	0.405594
CYP2C9	29	0.00368114	0.338333
UGT1A9	29	0.00360945	0.328213
ADRB2	29	0.0159949	0.376973
ADORA1	29	0.00200385	0.331429
DRD4	29	0.00498054	0.339181
HTR1A	29	0.00457696	0.33777
HTR2C	29	0.00232322	0.361532
KDR	29	0.00314781	0.406
E2F1	29	0.0112986	0.396872
CDC27	29	0.00097068	0.358974
CCNE1	29	0.0007064	0.374194
CDC25C	29	0.00749419	0.388517
FOXO3	29	0.00202019	0.396872
UGT1A1	28	0.00168603	0.31016
CXCR2	28	0.00068767	0.33306
CXCR1	28	0.00068767	0.33306
DRD2	28	0.00090008	0.328479
CYP1A2	28	0.0042942	0.322478
CYP2C8	28	0.00335302	0.338052
OPRM1	28	0.00170268	0.33526
MCM8	28	0.00052195	0.336929
BUB1B	28	0.00031905	0.331158
SKP1	28	0.00245394	0.367421
HSP90AB1	27	0.00814702	0.407222
UGT1A4	27	0.00065821	0.306878
UGT1A8	27	0.00065821	0.306878
UGT1A10	27	0.00065821	0.306878
CCR2	27	0.0019784	0.33035
OPRD1	27	0.00032531	0.326367
HTR1D	27	0.00040859	0.326892
ADRA1B	27	0.00013201	0.358341
HTR5A	27	0.00024804	0.331158
ORC5	27	5.056e-05	0.33665
CALM2	27	0.00828802	0.396098
ANAPC10	27	0.00080817	0.358025
LIG1	27	0.00039676	0.334156
PTTG1	27	0.00065932	0.3701
GMNN	26	5.767e-05	0.329813
PRKCA	26	0.0121752	0.394558
CNR1	26	0	0.326104
OPRK1	26	0	0.326104
DRD3	26	0	0.326104
HTR2A	26	0.00208745	0.35961
ADRA2C	26	0	0.326104
ADRA2A	26	0	0.326104
HCAR2	26	0	0.326104
NPY1R	26	0	0.326104
NPY2R	26	0	0.326104
CCR4	26	0	0.326104
CCKAR	26	0.00072828	0.371455
HTR2B	26	0.00208745	0.35961
CHRM4	26	0	0.326104
ADRA2B	26	0	0.326104
AVPR1A	26	0.00012007	0.358025
AVPR1B	26	0.00012007	0.358025
ORC4	26	3.955e-05	0.336093
ORC3	26	3.955e-05	0.336093
LCK	25	0.00234828	0.377674
GSK3B	25	0.00225039	0.410931
PGR	25	0.0020675	0.415984
AVPR2	25	0.0101237	0.367754
CYSLTR1	25	0.00283671	0.370776
OXTR	25	3.378e-05	0.357709
CHRM3	25	3.378e-05	0.357709
CHRM5	25	3.378e-05	0.357709
NCOR2	24	0.00332362	0.373849
UGT2B17	24	0.00939895	0.318932
ADRA1A	24	0	0.356453
HRH1	24	0	0.356453
ADRA1D	24	0	0.356453
PTAFR	24	0	0.356453
TACR2	24	0	0.356453
CDC23	24	0.00064801	0.35614
CDC16	24	0.00064801	0.35614
MAPK12	23	0.00077345	0.380506
MMP2	23	0.00359143	0.402379
PPARG	23	0.00861707	0.40804
UGT2B15	23	0.00065821	0.306415
ANAPC4	23	0.00061005	0.355828
TLR4	22	0.00431712	0.391137
RPS6KB1	22	0.00127531	0.399213
SMAD3	22	0.00227227	0.39726
PLA2G1B	22	0.0101739	0.374194
UGT2A1	22	0.00065821	0.302308
RFC1	22	0.00069323	0.337209
CKS1B	22	0.00013046	0.341463
NFKBIA	22	0.00151057	0.394942
CYP2A6	21	0.00112469	0.306415
MAPK13	21	0.00054945	0.375926
AKR1C3	21	0.00258622	0.306184
ADORA2A	21	0.00547657	0.339749
HTR7	21	0.00290228	0.312068
CCND3	21	0.00113976	0.386667
BCL2L11	21	9.619e-05	0.385565
CKS2	21	0.00010242	0.340319
MAPK10	20	0.00085504	0.389262
MAPK9	20	0.00068578	0.394175
HDAC3	20	0.00244327	0.373849
CYP19A1	20	0.00823885	0.352431
POLD3	20	0.00146069	0.318431
TOP2B	19	0.00069743	0.320949
MCL1	19	0.00061951	0.402379
CDC25B	19	0.0017337	0.347305
AOX1	19	0.00284605	0.308511
ADRB1	19	0.00200482	0.316199
HTR6	19	0.00032747	0.304805
DRD5	19	0.00884982	0.317435
TRAF6	19	0.00609394	0.373849
POLD2	19	0.00130658	0.317435
MMP1	18	0.0114081	0.393411
PLA2G2A	18	0.00306745	0.360889
CYP2D6	18	0.00187779	0.31303
VIPR1	18	0.00044718	0.306184
XPO1	18	0.00090775	0.369091
CYP2C19	18	0.0048068	0.339749
TSHR	18	5.148e-05	0.30412
ADRB3	18	5.148e-05	0.30412
PLA2G2F	18	0.00306745	0.360889
PLA2G2E	18	0.00306745	0.360889
DRD1	18	5.148e-05	0.30412
HRH2	18	5.148e-05	0.30412
GPBAR1	18	0.00067129	0.304805
NR3C1	17	0.00552941	0.393792
EHMT2	17	0.0165622	0.361854
DNM1	17	0.00620112	0.381579
AKR1C1	17	0.00205039	0.304348
CALCR	17	0	0.300296
CBR3	17	0.00869773	0.322478
MC4R	17	0	0.300296
MC5R	17	0	0.300296
MC3R	17	0	0.300296
CAMK2B	16	0.00274328	0.360248
RAD52	16	4.184e-05	0.310873
SGK1	16	0.00074786	0.373849
HSF1	16	0.00246869	0.385565
POLK	16	1.98e-05	0.309924
PPARA	16	0.00514743	0.40519
APEX1	16	0.00407067	0.369763
HSD17B2	16	0.00010467	0.299852
ALOX15	16	0.00101944	0.334432
PTGS1	16	0.00181966	0.334432
HSD11B1	16	0.00143695	0.321457
ALDH1A1	16	6.514e-05	0.300074
PTGES3	16	0.00809673	0.371455
RPTOR	16	0.00025888	0.367089
MSH6	16	0.00040493	0.362824
NCOA2	16	0.00388326	0.367421
FLT1	15	0.00077161	0.367421
PTPRC	15	0.00960507	0.367421
MAPT	15	0.00131966	0.381938
HSD17B1	15	7.236e-05	0.299631
MITF	15	0.00499263	0.385932
ALOX5	15	0.00316489	0.345238
CSNK2A1	15	0.00219865	0.381938
RPS6KA3	15	0.00040772	0.381938
RPS6KA5	15	0.00014359	0.362177
CYP1B1	15	0.00021901	0.303211
MAPKAPK2	14	0.0005622	0.353043
POLB	14	0.00046863	0.309451
ESR2	14	0.00134761	0.380506
ALOX15B	14	0.00026036	0.333882
RICTOR	14	8.683e-05	0.353351
TIMP1	14	0.00148968	0.378026
POLH	13	3.23e-06	0.309216
POLI	13	0.00083662	0.320949
CES1	13	0.00250216	0.320695
ALOX12	13	0	0.32506
CES2	13	0.00250216	0.320695
CDC37	13	0.00046422	0.383743
HSP90B1	13	0.00067733	0.347901
CAMK2D	13	0.00418507	0.354585
TOP1	12	0.00312806	0.363799
PPP3CA	12	0.00123733	0.355517
PTPN1	12	0.00071454	0.362177
HSPB1	12	0.0002097	0.381938
EPAS1	12	0.00371915	0.353967
GUSB	12	0.00100133	0.285313
HDAC6	12	0.00106419	0.342327
AKR1C4	12	0.00069106	0.279422
MLST8	12	9.449e-05	0.353351
PKM	12	0.00729299	0.345238
REV1	12	0	0.30898
CAMK2A	12	0.00132639	0.348498
USP1	11	0.00075058	0.30898
KAT2A	11	0.00080969	0.364126
HDAC5	11	0.00093585	0.319182
THRB	11	0.00040959	0.366426
PTPN6	11	6.505e-05	0.355517
ENO1	11	0.0225271	0.355206
PKLR	11	0.00541177	0.338333
MMP3	10	0.00107009	0.338052
HDAC4	10	0.00023212	0.33665
MAOA	10	0.0127871	0.300518
MMP14	10	0.00090682	0.348797
SPTAN1	10	0.00320928	0.360568
ABCB1	9	0.00690043	0.396098
HSPA5	9	0.00034611	0.344945
AKR1B1	9	0.0310732	0.290207
RECQL	9	1.585e-05	0.29635
P4HB	9	0.00312163	0.345238
SLCO1B1	9	0.00712197	0.342327
CYP17A1	9	0.0013855	0.33306
XIAP	9	0.00113728	0.35614
CDK5R1	9	0.00011985	0.363474
SCN5A	9	0.00503765	0.309216
PPP3R1	9	0.00037669	0.338898
CASP7	8	0.00016141	0.358657
MAPKAPK5	8	9.24e-06	0.351515
MMP13	8	9.452e-05	0.304576
SHH	8	0.00032331	0.38015
SLC6A4	8	0.00091693	0.29399
TPI1	8	0.0108428	0.336093
AHR	7	0.00279849	0.355828
PIN1	7	3.551e-05	0.368421
NFE2L2	7	0.00073367	0.358974
HTR3A	7	0.00016837	0.281749
MAOB	7	0.00259719	0.27923
FLT3	7	0.00084424	0.348498
PYGM	7	0.015505	0.306184
MCMBP	7	0	0.262783
SUGT1	7	8.139e-05	0.325321
CASP1	6	1.687e-05	0.359292
SLC6A3	6	0.00100309	0.310635
ABCG2	6	0.00784629	0.346121
G6PD	6	0.00112393	0.365437
PTPN2	6	0.00050309	0.344652
STIP1	6	1.596e-05	0.320189
TIMP2	6	1.162e-05	0.298529
AHSA1	6	2.03e-06	0.319937
FGF12	6	0.000286	0.332787
NFKB2	5	0.00013651	0.347009
PRSS1	5	0.00492611	0.295488
MPO	5	0.00132432	0.344068
ATAD5	5	0	0.301634
NR1H3	5	1.317e-05	0.340604
AKR1B10	5	0.00484599	0.261767
STAT6	5	0.00110493	0.329278
PDK1	5	1.062e-05	0.331699
PGK1	5	0	0.327684
TUBB2B	4	0.00020701	0.279422
EGLN1	4	7.326e-05	0.336093
MYLK	4	9.73e-06	0.333333
NR1H4	4	0.0007994	0.327948
SORD	4	0.00068095	0.261767
TUBB1	4	0.00020701	0.279422
PLA2G7	4	0	0.273033
RUNX1	4	6.221e-05	0.314241
CTSG	4	7.738e-05	0.295273
NOX4	4	1.028e-05	0.330888
GLA	4	0.019595	0.226184
SGK2	4	0	0.308042
AKR1A1	4	0.00082183	0.250772
ABCC2	4	0.00019776	0.270306
LY96	4	0.00038827	0.308511
SCN10A	4	0	0.300518
TUBA1B	3	0	0.268164
XDH	3	0	0.250308
CA9	3	5.919e-05	0.35614
PTPRA	3	0	0.322991
ELANE	3	1.551e-05	0.286723
TBXAS1	3	0	0.314729
NT5E	3	0.00494917	0.31016
GAA	3	0.00982789	0.184882
SLCO1B3	3	0.00212713	0.306647
DCXR	3	0	0.225305
TDP1	3	1.216e-05	0.275628
DHCR7	3	0.00984005	0.29831
AMY1A	3	0	0.234818
AMY1B	3	0	0.234818
ADORA3	3	0	0.291457
CA2	3	0	0.315953
AMY1C	3	0	0.234818
AKR1C2	3	1.11e-06	0.235499
CD38	3	3.707e-05	0.301859
ODC1	3	0.00218988	0.338333
SLC22A8	3	6.335e-05	0.255668
DYRK1A	3	6.567e-05	0.317188
WDR48	3	0.0002187	0.309924
HIF1AN	2	0	0.304348
BACE1	2	0.00073197	0.322478
ME3	2	0	0.256962
USP2	2	5.35e-06	0.291248
ACHE	2	0	0.345532
CTRB1	2	0	0.289793
AGA	2	0	0.156154
BRSK1	2	0	0.280775
PTPRF	2	0	0.32506
CBR1	2	0.00016306	0.227324
GLO1	2	0	0.231735
TLR9	2	0	0.273401
GLS	2	0	0.156154
GSR	2	3.132e-05	0.267633
HPGD	2	0.00044063	0.306878
HSD11B2	2	3.29e-05	0.287129
BCHE	2	0	0.327156
SERPINC1	2	0	0.317435
USP12	2	0	0.305263
SMN2	1	0	1
SMN1	1	0	1
CTRC	1	0	0.228218
KCNH2	1	0	0.236321
PDE5A	1	0	0.236873
NEU2	1	0	0.184545
ABCC1	1	0	0.257288
TRPV4	1	0	0.283124
EBP	1	0	0.229898
DPP4	1	0	0.268874
GALK1	1	0	0.275441
TYR	1	0	0.278655
ACP1	1	0	0.313998
SLC22A2	1	0	0.265881
SIGMAR1	1	0	0.229898
MLL	1	0	0.342327
