# Supplementary material for: Network Pharmacology-Based Approach to Investigate the Mechanisms of Hedyotis diffusa Willd. in the Treatment of Gastric Cancer
Source: Evid Based Complement Alternat Med. 2018 May 2;2018:7802639. doi: 10.1155/2018/7802639 (PMC5954954; doi:10.1155/2018/7802639)
Supplement: Supplementary 7 — Table S7: topological features of all nodes in the PPI network of GC targets. [file 7802639.f7.xlsx]

## Sheet: Sheet1
Table S7 Topological features of all nodes in the PPI network of GC targets.
Name	Degree	Betweenness centrality	Closeness centrality
TP53	67	0.222306	0.605364
PCNA	62	0.099722	0.552448
RFC4	47	0.0204076	0.5
CDK7	42	0.0132071	0.478788
CDK2	41	0.0358162	0.524917
BRCA1	41	0.0153167	0.48318
CCND1	40	0.0275863	0.512987
PIK3CA	40	0.0207836	0.495298
RFC3	40	0.0105573	0.480243
CCNH	40	0.00905698	0.474474
AKT1	39	0.0475437	0.526667
MNAT1	39	0.00590491	0.451429
EGF	38	0.0240498	0.518033
RFC5	38	0.00960541	0.477341
VEGFA	37	0.0317899	0.523179
ERCC3	37	0.0266129	0.490683
RFC2	37	0.00709677	0.470238
POLD1	37	0.00415701	0.428184
ERCC2	36	0.00721641	0.467456
GTF2H1	36	0.00703865	0.467456
GTF2H3	34	0.00315421	0.44382
GTF2H2	34	0.00315421	0.44382
POLR2F	33	0.0289482	0.456647
HSP90AA1	32	0.083612	0.521452
ERCC1	32	0.00194113	0.419098
CDKN1A	31	0.0146084	0.496855
PIK3CB	31	0.00539007	0.459302
ERCC4	31	0.00183393	0.417989
RFC1	31	0.00159559	0.412533
EGFR	30	0.0237982	0.508039
FEN1	30	0.00438771	0.435262
GTF2H5	30	0.0012581	0.412533
GTF2H4	30	0.0012581	0.412533
CDKN1B	29	0.0166001	0.487654
PIK3CG	29	0.00377221	0.456647
PIK3CD	29	0.00377221	0.456647
XPA	29	0.00167549	0.414698
BCL2	28	0.0142943	0.501587
MAPK1	28	0.0172706	0.477341
LIG1	28	0.00160112	0.421333
CCNB1	27	0.00979632	0.478788
TOP2A	27	0.022922	0.473054
POLD3	27	0.00018876	0.408269
POLD2	27	0.00018876	0.408269
KRAS	26	0.0307786	0.475904
XRCC1	26	0.00178846	0.452722
CTNNB1	24	0.0295863	0.468843
CCNA2	23	0.00341878	0.466077
TYMS	23	0.0575056	0.463343
MSH2	23	0.00887119	0.460641
MTOR	23	0.00529395	0.459302
PTGS2	23	0.00931186	0.454023
MCM5	23	0.0032574	0.421333
ERBB2	22	0.00681964	0.468843
CDH1	22	0.0105006	0.446328
MDM2	20	0.0186058	0.455331
KDR	20	0.00636153	0.44507
HGF	20	0.00358566	0.441341
XRCC3	20	0.00052507	0.39206
HSP90AB1	19	0.031716	0.474474
CAD	19	0.0785359	0.456647
RRM1	19	0.00097605	0.413613
CALM1	19	0.0293066	0.407216
GTF2F1	19	0.00362802	0.404092
DPYD	19	0.0256652	0.383495
MSH6	18	0.00603746	0.454023
MLH1	18	0.00676405	0.452722
NOS3	18	0.0157358	0.448864
MET	18	0.00406794	0.436464
CDC6	18	0.00108881	0.41039
GTF2F2	18	0.0021807	0.39899
FOXO1	17	0.00097511	0.437673
IL8	17	0.00820803	0.435262
CCNA1	17	0.00109106	0.431694
CCND3	17	0.0009616	0.427027
FGF1	17	0.00770116	0.425876
FGFR2	17	0.00932453	0.420213
CALM2	17	0.0263926	0.404092
GTF2E1	17	0.00114173	0.373522
RRM2	16	0.00082817	0.441341
GTF2B	16	0.00095419	0.367442
CCNE1	15	0.00034197	0.429348
CCNB2	15	0.00061613	0.415789
PTGES3	15	0.00849004	0.39899
FLT1	15	0.00099187	0.380723
GTF2E2	15	0	0.363218
RAF1	14	0.00102316	0.44382
FOXO3	14	0.00065215	0.430518
HSP90B1	14	0.00754633	0.40617
FLT4	14	0.00062463	0.373522
UMPS	14	0.00903461	0.372642
PMS2	13	0.00137692	0.427027
VEGFC	13	0.00058234	0.375297
POLH	13	9.762e-05	0.372642
BAX	12	9.9e-05	0.417989
CPS1	12	0.00316911	0.358277
CDC37	11	0.00160341	0.442577
IL1B	11	0.0106469	0.415789
MSH3	11	0.00214898	0.395
FGF10	11	0.00022441	0.369159
REV1	10	8.96e-06	0.364055
AHSA1	10	0.00024188	0.353468
DPYSL2	10	0.00096166	0.331237
DHODH	10	8.796e-05	0.331237
RRM2B	9	0.00171105	0.434066
FGF12	9	0.0037056	0.363218
POLI	9	0	0.363218
DPYSL4	9	0	0.330544
DPYSL3	9	0	0.330544
DPYSL5	9	0	0.330544
CRMP1	9	0	0.330544
SCN5A	9	0.00103614	0.302682
DHFR	8	0.00478758	0.441341
CHTF18	8	8.96e-06	0.364896
PGF	8	0.0001257	0.362385
CAMK2B	8	0.00209682	0.358277
CYP2A6	8	0.00815815	0.323108
SOD2	7	0.0014742	0.4
TYMP	7	0.0096531	0.394015
CAMK2A	7	0.00152548	0.357466
SPTAN1	7	0.013707	0.334038
AXIN1	6	0.00231832	0.40617
MUTYH	6	0.00048952	0.397985
GSTP1	6	0.0216578	0.396985
IRF1	6	0.00236929	0.358277
CYP3A5	6	0.00080581	0.307393
CYP3A4	6	0.00080581	0.307393
GSTT1	6	0.0002634	0.296992
GSTM1	6	0.0002634	0.296992
ABCB1	5	0.0144585	0.41039
APC	5	0.00128146	0.391089
TTC28	5	0	0.349558
TTC12	5	0	0.349558
SUGT1P3	5	0	0.349558
TTC31	5	0	0.349558
STIP1	5	0	0.349558
SUGT1	5	0	0.349558
DPYS	5	0	0.327122
SCN1A	5	0	0.292593
SCN10A	5	0	0.292593
SPARC	4	0	0.348786
PPP3CA	4	3.603e-05	0.335456
MTR	4	7.519e-05	0.329854
TOP1	3	0	0.417989
IGFBP3	3	0	0.39599
NQO1	3	0.0099436	0.384428
ASS1	3	0.00176314	0.351111
GAST	3	0	0.348786
CDA	3	0.00030263	0.330544
MTHFR	3	0	0.328482
AXIN2	3	0	0.321138
KCNQ1	3	0	0.290976
CASP10	2	0	0.384428
SOD3	2	0	0.346491
S100A8	2	1.344e-05	0.314741
IL1RN	2	0	0.307992
AEN	1	0	0.356659
ENOSF1	1	0	0.317269
CD55	1	0	0.250794
