# Supplementary material for: Network Pharmacology-Based Approach to Investigate the Mechanisms of Hedyotis diffusa Willd. in the Treatment of Gastric Cancer
Source: Evid Based Complement Alternat Med. 2018 May 2;2018:7802639. doi: 10.1155/2018/7802639 (PMC5954954; doi:10.1155/2018/7802639)
Supplement: Supplementary 8 — Table S8: topological features of all nodes in the PPI network of targets for HDW against GC. [file 7802639.f8.xlsx]

## Sheet: Sheet1
Table S8 Topological features of all nodes in the PPI network of targets for HDW against GC.
Name	Degree	Betweenness centrality	Closeness centrality
TP53	36	0.199402	0.656863
PCNA	32	0.148263	0.598214
CDK2	26	0.0784484	0.582609
AKT1	25	0.0627175	0.598214
PIK3CA	24	0.0147573	0.544715
HSP90AA1	23	0.0916423	0.563025
RFC4	23	0.0293146	0.523438
CDKN1B	22	0.0265166	0.527559
EGF	22	0.0132141	0.567797
EGFR	21	0.0412298	0.577586
BCL2	21	0.0254124	0.577586
CCND1	21	0.0133669	0.54918
VEGFA	21	0.0106829	0.563025
PIK3CG	21	0.00526562	0.51938
PIK3CB	21	0.00526562	0.51938
PIK3CD	21	0.00526562	0.51938
MTOR	20	0.0132851	0.51938
MAPK1	19	0.028727	0.536
RFC3	19	0.0178195	0.503759
RFC5	18	0.0166127	0.5
CCNB1	18	0.0146815	0.515385
FEN1	18	0.0073149	0.462069
RFC2	17	0.0107499	0.482014
MDM2	16	0.0519467	0.531746
NOS3	16	0.0230639	0.503759
MCM5	16	0.00686962	0.458904
TOP2A	16	0.00652086	0.478571
POLD1	16	0.00261787	0.416149
CALM2	15	0.0469848	0.462069
CALM1	15	0.0469848	0.462069
CCNA2	15	0.0052824	0.496296
ERBB2	15	0.00453215	0.478571
CDC6	14	0.00323007	0.452703
PTGS2	14	0.00239735	0.485507
FOXO1	14	0.00127548	0.482014
KDR	13	0.00696469	0.482014
LIG1	13	0.00293189	0.443709
RFC1	13	0.00077534	0.403614
HSP90AB1	12	0.0295155	0.492647
CCNA1	12	0.0036339	0.465278
FOXO3	11	0.00072426	0.468531
PTGES3	10	0.00975284	0.440789
CCNE1	10	0.00093161	0.465278
CCNB2	10	0.00050709	0.437908
POLD2	10	0	0.39645
POLD3	10	0	0.39645
HSP90B1	9	0.00341238	0.421384
FLT1	9	0.00222284	0.424051
CDC37	9	0.00208139	0.455782
POLH	9	0	0.394118
REV1	9	0	0.394118
POLI	9	0	0.394118
CCND3	8	0.0007491	0.452703
CAMK2B	7	0.00714247	0.41358
SCN5A	7	0.00199269	0.340102
MSH6	7	0.00103907	0.449664
FGF12	6	0.00499719	0.401198
CAMK2A	6	0.00465578	0.411043
AHSA1	6	9.046e-05	0.376404
STIP1	5	0	0.374302
SUGT1	5	0	0.374302
ABCB1	4	0.0587969	0.443709
PPP3CA	4	0.00020604	0.374302
SCN10A	4	0	0.322115
SPTAN1	4	0	0.322115
TOP1	3	0	0.437908
CYP3A4	2	0.0298507	0.311628
CYP2A6	1	0	0.238434
