# Supplementary material for: Network Pharmacology-Based Approach to Investigate the Mechanisms of Hedyotis diffusa Willd. in the Treatment of Gastric Cancer
Source: Evid Based Complement Alternat Med. 2018 May 2;2018:7802639. doi: 10.1155/2018/7802639 (PMC5954954; doi:10.1155/2018/7802639)
Supplement: Supplementary 9 — Table S9: GO enrichment analysis for the targets in different modules (p value < 0.01 and FDR < 0.01). [file 7802639.f9.xlsx]

## Sheet: Sheet1
Table S9 GO enrichment analysis for the genes in different modules (p-value <0.01 and FDR <0.01).
Module	Category	Term	Count	%	PValue	Genes	List Total	Pop Hits	Pop Total	Fold Enrichment	Bonferroni	Benjamini	FDR
Module 1	GOTERM_BP_DIRECT	GO:0019985~translesion synthesis	12	36.3636	1.0052e-22	RFC5, POLD3, RFC3, REV1, RFC4, POLI, POLH, RFC1, RFC2, POLD1, POLD2, PCNA	33	36	16792	169.616	7.97123e-20	7.97123e-20	1.5412e-19
Module 1	GOTERM_BP_DIRECT	GO:0006260~DNA replication	15	45.4545	7.24877e-21	POLI, REV1, POLH, LIG1, RFC5, POLD3, RFC3, RFC4, RFC1, RFC2, POLD1, POLD2, PCNA, EGF, FEN1	33	155	16792	49.2434	5.74828e-18	2.87414e-18	1.1114e-17
Module 1	GOTERM_BP_DIRECT	GO:0000722~telomere maintenance via recombination	11	33.3333	8.25364e-21	RFC5, POLD3, RFC3, RFC4, RFC1, RFC2, LIG1, POLD1, POLD2, PCNA, FEN1	33	32	16792	174.917	6.54514e-18	2.18171e-18	1.26547e-17
Module 1	GOTERM_BP_DIRECT	GO:0006297~nucleotide-excision repair, DNA gap filling	10	30.303	1.23081e-19	RFC5, POLD3, RFC3, RFC4, RFC1, RFC2, LIG1, POLD1, POLD2, PCNA	33	24	16792	212.02	9.76035e-17	2.44009e-17	1.88712e-16
Module 1	GOTERM_BP_DIRECT	GO:0042769~DNA damage response, detection of DNA damage	9	27.2727	1.95357e-15	RFC5, POLD3, RFC3, RFC4, RFC1, RFC2, POLD1, POLD2, PCNA	33	36	16792	127.212	1.58473e-12	3.16969e-13	3.06422e-12
Module 1	GOTERM_BP_DIRECT	GO:0042276~error-prone translesion synthesis	8	24.2424	2.2331e-15	RFC5, RFC3, REV1, RFC4, POLI, RFC1, RFC2, PCNA	33	19	16792	214.252	1.76081e-12	2.93432e-13	3.40838e-12
Module 1	GOTERM_BP_DIRECT	GO:0006296~nucleotide-excision repair, DNA incision, 5'-to lesion	9	27.2727	2.48892e-15	RFC5, POLD3, RFC3, RFC4, RFC1, RFC2, POLD1, POLD2, PCNA	33	37	16792	123.774	1.9369e-12	2.76668e-13	3.74145e-12
Module 1	GOTERM_BP_DIRECT	GO:0033683~nucleotide-excision repair, DNA incision	9	27.2727	3.14812e-15	RFC5, POLD3, RFC3, RFC4, RFC1, RFC2, POLD1, POLD2, PCNA	33	38	16792	120.517	2.46514e-12	3.08198e-13	4.76286e-12
Module 1	GOTERM_BP_DIRECT	GO:0006283~transcription-coupled nucleotide-excision repair	10	30.303	9.82411e-15	RFC5, POLD3, RFC3, RFC4, RFC1, RFC2, LIG1, POLD1, POLD2, PCNA	33	74	16792	68.7633	7.74758e-12	8.60867e-13	1.49769e-11
Module 1	GOTERM_CC_DIRECT	GO:0005663~DNA replication factor C complex	6	18.1818	7.20636e-14	RFC5, RFC3, RFC4, RFC1, RFC2, PCNA	33	6	18224	552.242	7.56561e-12	7.56561e-12	8.07132e-11
Module 1	GOTERM_BP_DIRECT	GO:0070987~error-free translesion synthesis	7	21.2121	7.76777e-13	RFC5, RFC3, RFC4, POLH, RFC1, RFC2, PCNA	33	19	16792	187.47	6.16021e-10	6.16021e-11	1.19105e-09
Module 1	GOTERM_BP_DIRECT	GO:0048015~phosphatidylinositol-mediated signaling	9	27.2727	1.78872e-11	PIK3CG, AKT1, EGFR, PIK3CB, ERBB2, PIK3CD, PIK3CA, MTOR, EGF	33	106	16792	43.2041	1.41846e-08	1.28951e-09	2.74253e-08
Module 1	GOTERM_BP_DIRECT	GO:0006271~DNA strand elongation involved in DNA replication	6	18.1818	5.36619e-11	POLD3, RFC3, RFC4, POLD1, POLD2, PCNA	33	15	16792	203.539	4.25538e-08	3.54615e-09	8.2276e-08
Module 1	GOTERM_BP_DIRECT	GO:0014066~regulation of phosphatidylinositol 3-kinase signaling	8	24.2424	1.08646e-10	AKT1, EGFR, MAPK1, PIK3CB, ERBB2, PIK3CD, PIK3CA, EGF	33	78	16792	52.1896	8.6156e-08	6.62738e-09	1.66579e-07
Module 1	GOTERM_CC_DIRECT	GO:0005654~nucleoplasm	22	66.6667	1.58815e-10	POLI, REV1, POLH, LIG1, TP53, FOXO1, RFC5, POLD3, AKT1, MAPK1, CCND1, RFC3, RFC4, CDKN1B, RFC1, RFC2, POLD1, POLD2, PCNA, MTOR, TOP2A, FEN1	33	2784	18224	4.36398	1.66756e-08	8.3378e-09	1.77893e-07
Module 1	GOTERM_MF_DIRECT	GO:0019899~enzyme binding	11	33.3333	3.42309e-10	RFC5, AKT1, EGFR, CCND1, RFC4, PTGS2, RFC2, POLD1, PCNA, TP53, TOP2A	33	333	16881	16.8979	5.68234e-08	5.68234e-08	4.15933e-07
Module 1	GOTERM_MF_DIRECT	GO:0003689~DNA clamp loader activity	5	15.1515	7.40259e-10	RFC5, RFC3, RFC4, RFC1, RFC2	33	8	16881	319.716	1.22883e-07	6.14415e-08	8.99472e-07
Module 1	GOTERM_MF_DIRECT	GO:0046934~phosphatidylinositol-4,5-bisphosphate 3-kinase activity	7	21.2121	1.61096e-09	PIK3CG, EGFR, PIK3CB, ERBB2, PIK3CD, PIK3CA, EGF	33	62	16881	57.7551	2.67419e-07	8.91396e-08	1.95744e-06
Module 1	GOTERM_MF_DIRECT	GO:0003684~damaged DNA binding	7	21.2121	1.77818e-09	REV1, POLI, POLH, POLD1, PCNA, TP53, FEN1	33	63	16881	56.8384	2.95177e-07	7.37943e-08	2.16062e-06
Module 1	GOTERM_CC_DIRECT	GO:0005942~phosphatidylinositol 3-kinase complex	5	15.1515	7.7391e-09	PIK3CG, PIK3CB, PIK3CD, PIK3CA, MTOR	33	14	18224	197.229	8.12606e-07	2.70869e-07	8.66876e-06
Module 1	GOTERM_MF_DIRECT	GO:0016301~kinase activity	9	27.2727	1.20241e-08	PIK3CG, AKT1, MAPK1, CDKN1B, PIK3CB, ERBB2, PIK3CD, PIK3CA, MTOR	33	241	16881	19.1034	1.996e-06	3.99199e-07	1.46102e-05
Module 1	GOTERM_MF_DIRECT	GO:0005524~ATP binding	16	48.4848	2.00076e-08	PIK3CG, EGFR, PIK3CB, ERBB2, LIG1, PIK3CD, TP53, RFC5, AKT1, MAPK1, RFC4, RFC1, RFC2, PIK3CA, MTOR, TOP2A	33	1495	16881	5.47473	3.32126e-06	5.53543e-07	2.43108e-05
Module 1	GOTERM_BP_DIRECT	GO:0046854~phosphatidylinositol phosphorylation	7	21.2121	2.10979e-08	PIK3CG, EGFR, PIK3CB, ERBB2, PIK3CD, PIK3CA, EGF	33	94	16792	37.893	1.67305e-05	1.19505e-06	3.2348e-05
Module 1	GOTERM_MF_DIRECT	GO:0005515~protein binding	32	96.9697	2.49379e-08	PTGS2, ERBB2, FOXO1, AKT1, BCL2, PIK3CA, NOS3, EGF, TOP2A, FEN1, PIK3CG, EGFR, POLI, REV1, POLH, PIK3CB, PIK3CD, TP53, RFC5, POLD3, MAPK1, CCND1, RFC3, RFC4, CDKN1B, RFC1, RFC2, POLD1, POLD2, VEGFA, PCNA, MTOR	33	8785	16881	1.86334	4.13969e-06	5.91385e-07	3.03015e-05
Module 1	GOTERM_MF_DIRECT	GO:0035004~phosphatidylinositol 3-kinase activity	4	12.1212	6.17157e-08	PIK3CG, PIK3CB, PIK3CD, PIK3CA	33	5	16881	409.236	1.02448e-05	1.2806e-06	7.49893e-05
Module 1	GOTERM_MF_DIRECT	GO:0035005~1-phosphatidylinositol-4-phosphate 3-kinase activity	4	12.1212	2.15449e-07	PIK3CG, PIK3CB, PIK3CD, PIK3CA	33	7	16881	292.312	3.57638e-05	3.97382e-06	0.000261787
Module 1	GOTERM_BP_DIRECT	GO:1900264~positive regulation of DNA-directed DNA polymerase activity	4	12.1212	2.18887e-07	RFC5, RFC3, RFC4, RFC2	33	7	16792	290.771	0.000173562	1.15717e-05	0.000335603
Module 1	GOTERM_BP_DIRECT	GO:0006281~DNA repair	8	24.2424	2.4023e-07	RFC5, REV1, POLI, POLH, LIG1, POLD1, MTOR, FEN1	33	235	16792	17.3225	0.000190484	1.19063e-05	0.000368327
Module 1	GOTERM_MF_DIRECT	GO:0003887~DNA-directed DNA polymerase activity	5	15.1515	2.44262e-07	POLD3, POLI, POLH, POLD1, POLD2	33	29	16881	88.1975	4.05466e-05	4.05474e-06	0.000296797
Module 1	GOTERM_CC_DIRECT	GO:0031390~Ctf18 RFC-like complex	4	12.1212	2.73759e-07	RFC5, RFC3, RFC4, RFC2	33	8	18224	276.121	2.87443e-05	7.18614e-06	0.000306643
Module 1	GOTERM_BP_DIRECT	GO:0006298~mismatch repair	5	15.1515	5.45509e-07	POLD3, LIG1, POLD1, POLD2, PCNA	33	35	16792	72.6926	0.000432495	2.54461e-05	0.000836388
Module 1	GOTERM_MF_DIRECT	GO:0043142~single-stranded DNA-dependent ATPase activity	4	12.1212	7.35829e-07	RFC5, RFC3, RFC4, RFC2	33	10	16881	204.618	0.00012214	1.11043e-05	0.000894086
Module 1	GOTERM_BP_DIRECT	GO:0038128~ERBB2 signaling pathway	5	15.1515	7.65963e-07	AKT1, EGFR, ERBB2, PIK3CA, EGF	33	38	16792	66.9537	0.000607225	3.37444e-05	0.00117439
Module 1	GOTERM_BP_DIRECT	GO:0071456~cellular response to hypoxia	6	18.1818	9.79743e-07	AKT1, PTGS2, BCL2, VEGFA, TP53, MTOR	33	96	16792	31.803	0.000776635	4.08906e-05	0.00150216
Module 1	GOTERM_BP_DIRECT	GO:0016310~phosphorylation	6	18.1818	1.2003e-06	PIK3CG, AKT1, PIK3CB, PIK3CD, PIK3CA, MTOR	33	100	16792	30.5309	0.000951387	4.75909e-05	0.00184032
Module 1	GOTERM_BP_DIRECT	GO:0006974~cellular response to DNA damage stimulus	7	21.2121	2.32781e-06	AKT1, MAPK1, CCND1, BCL2, TP53, FOXO1, TOP2A	33	208	16792	17.1247	0.00184425	8.78989e-05	0.00356902
Module 1	GOTERM_BP_DIRECT	GO:1901796~regulation of signal transduction by p53 class mediator	6	18.1818	3.4757e-06	RFC5, AKT1, RFC3, RFC4, RFC2, TP53	33	124	16792	24.6217	0.00275244	0.000125276	0.00532892
Module 1	GOTERM_BP_DIRECT	GO:0001934~positive regulation of protein phosphorylation	6	18.1818	3.90886e-06	AKT1, EGFR, CCND1, ERBB2, VEGFA, MTOR	33	127	16792	24.0401	0.00309493	0.000134762	0.00599302
Module 1	GOTERM_BP_DIRECT	GO:0043406~positive regulation of MAP kinase activity	5	15.1515	4.59221e-06	PIK3CG, EGFR, ERBB2, VEGFA, EGF	33	59	16792	43.1228	0.003635	0.000151723	0.00704068
Module 1	GOTERM_CC_DIRECT	GO:0005634~nucleus	23	69.697	5.7574e-06	EGFR, REV1, POLI, PTGS2, PIK3CB, LIG1, ERBB2, TP53, FOXO1, POLD3, AKT1, MAPK1, CCND1, CDKN1B, RFC1, BCL2, POLD1, POLD2, PCNA, NOS3, MTOR, TOP2A, FEN1	33	5415	18224	2.34563	0.000604346	0.000120898	0.00644881
Module 2	GOTERM_BP_DIRECT	GO:0006950~response to stress	4	50	1.58003e-06	HSP90AB1, HSP90B1, STIP1, AHSA1	8	61	16792	137.639	0.000137453	0.000137453	0.00170762
Module 2	GOTERM_MF_DIRECT	GO:0051082~unfolded protein binding	4	50	9.24523e-06	HSP90AB1, PTGES3, HSP90B1, CDC37	8	110	16881	76.7318	0.000406709	0.000406709	0.00864927
Module 3	GOTERM_BP_DIRECT	GO:0051301~cell division	4	100	8.97931e-06	CCNB1, CDC6, CCNB2, MCM5	4	350	16792	47.9771	0.000520667	0.000520667	0.00893347
Module 4	GOTERM_MF_DIRECT	GO:0005516~calmodulin binding	4	80	5.48024e-06	CAMK2B, CAMK2A, SCN5A, SPTAN1	5	189	16881	71.454	0.000175353	0.000175353	0.00474624
