# Supplementary material for: Network Pharmacology-Based Approach to Investigate the Mechanisms of Hedyotis diffusa Willd. in the Treatment of Gastric Cancer
Source: Evid Based Complement Alternat Med. 2018 May 2;2018:7802639. doi: 10.1155/2018/7802639 (PMC5954954; doi:10.1155/2018/7802639)
Supplement: Supplementary 10 — Table S10: KEGG pathway enrichment analysis for the targets in different modules (p value < 0.01 and FDR < 0.01). [file 7802639.f10.xlsx]

## Sheet: Sheet1
Table S10 KEGG pathway enrichment analysis for the genes in different modules (p-value <0.01 and FDR <0.01).
Module	Category	Term	Count	%	PValue	Genes	List Total	Pop Hits	Pop Total	Fold Enrichment	Bonferroni	Benjamini	FDR
Module 1	KEGG_PATHWAY	hsa05215:Prostate cancer	15	45.4545	2.21606e-19	PIK3CG, EGFR, PIK3CB, ERBB2, PIK3CD, TP53, FOXO1, AKT1, MAPK1, CCND1, CDKN1B, BCL2, PIK3CA, MTOR, EGF	32	88	6910	36.8075	3.01384e-17	3.01384e-17	2.60143e-16
Module 1	KEGG_PATHWAY	hsa04066:HIF-1 signaling pathway	14	42.4242	6.81704e-17	EGFR, PIK3CG, PIK3CB, ERBB2, PIK3CD, AKT1, MAPK1, CDKN1B, BCL2, VEGFA, PIK3CA, NOS3, MTOR, EGF	32	98	6910	30.8482	1.5099e-14	7.54952e-15	1.33227e-13
Module 1	KEGG_PATHWAY	hsa03030:DNA replication	11	33.3333	1.5325e-16	RFC5, POLD3, RFC3, RFC4, RFC1, RFC2, LIG1, POLD1, POLD2, PCNA, FEN1	32	36	6910	65.9809	1.5099e-14	4.996e-15	1.33227e-13
Module 1	KEGG_PATHWAY	hsa03430:Mismatch repair	10	30.303	1.59995e-16	RFC5, POLD3, RFC3, RFC4, RFC1, RFC2, LIG1, POLD1, POLD2, PCNA	32	23	6910	93.8859	1.5099e-14	3.77476e-15	1.33227e-13
Module 1	KEGG_PATHWAY	hsa05212:Pancreatic cancer	12	36.3636	1.51917e-15	PIK3CG, AKT1, EGFR, MAPK1, CCND1, PIK3CB, ERBB2, PIK3CD, VEGFA, TP53, PIK3CA, EGF	32	65	6910	39.8654	2.11386e-13	4.22995e-14	1.82077e-12
Module 1	KEGG_PATHWAY	hsa05213:Endometrial cancer	11	33.3333	9.19276e-15	PIK3CG, AKT1, EGFR, MAPK1, CCND1, PIK3CB, ERBB2, PIK3CD, TP53, PIK3CA, EGF	32	52	6910	45.6791	1.25322e-12	2.08833e-13	1.08136e-11
Module 1	KEGG_PATHWAY	hsa05223:Non-small cell lung cancer	11	33.3333	2.04136e-14	PIK3CG, AKT1, EGFR, MAPK1, CCND1, PIK3CB, ERBB2, PIK3CD, TP53, PIK3CA, EGF	32	56	6910	42.4163	2.77822e-12	3.96905e-13	2.39808e-11
Module 1	KEGG_PATHWAY	hsa05214:Glioma	11	33.3333	1.003e-13	PIK3CG, AKT1, EGFR, MAPK1, CCND1, PIK3CB, PIK3CD, TP53, PIK3CA, MTOR, EGF	32	65	6910	36.5433	1.36344e-11	1.7043e-12	1.17684e-10
Module 1	KEGG_PATHWAY	hsa03420:Nucleotide excision repair	10	30.303	2.50035e-13	RFC5, POLD3, RFC3, RFC4, RFC1, RFC2, LIG1, POLD1, POLD2, PCNA	32	47	6910	45.9441	3.4003e-11	3.77809e-12	2.93499e-10
Module 1	KEGG_PATHWAY	hsa05200:Pathways in cancer	17	51.5152	1.21795e-12	EGFR, PIK3CG, PTGS2, PIK3CB, ERBB2, PIK3CD, TP53, FOXO1, AKT1, MAPK1, CCND1, CDKN1B, BCL2, VEGFA, PIK3CA, MTOR, EGF	32	393	6910	9.34081	1.65636e-10	1.65636e-11	1.42971e-09
Module 1	KEGG_PATHWAY	hsa04012:ErbB signaling pathway	11	33.3333	2.1078e-12	PIK3CG, AKT1, EGFR, MAPK1, CDKN1B, PIK3CB, ERBB2, PIK3CD, PIK3CA, MTOR, EGF	32	87	6910	27.3024	2.86655e-10	2.60596e-11	2.4743e-09
Module 1	KEGG_PATHWAY	hsa05230:Central carbon metabolism in cancer	10	30.303	4.81241e-12	PIK3CG, AKT1, EGFR, MAPK1, PIK3CB, ERBB2, PIK3CD, TP53, PIK3CA, MTOR	32	64	6910	33.7402	6.54483e-10	5.45403e-11	5.64924e-09
Module 1	KEGG_PATHWAY	hsa05218:Melanoma	10	30.303	1.27529e-11	PIK3CG, AKT1, EGFR, MAPK1, CCND1, PIK3CB, PIK3CD, TP53, PIK3CA, EGF	32	71	6910	30.4137	1.7344e-09	1.33415e-10	1.49706e-08
Module 1	KEGG_PATHWAY	hsa04151:PI3K-Akt signaling pathway	15	45.4545	5.64675e-11	EGFR, PIK3CG, AKT1, MAPK1, CCND1, CDKN1B, PIK3CB, BCL2, PIK3CD, VEGFA, TP53, PIK3CA, NOS3, MTOR, EGF	32	345	6910	9.38859	7.67958e-09	5.48541e-10	6.62872e-08
Module 1	KEGG_PATHWAY	hsa04370:VEGF signaling pathway	9	27.2727	1.54553e-10	PIK3CG, AKT1, MAPK1, PTGS2, PIK3CB, PIK3CD, VEGFA, PIK3CA, NOS3	32	61	6910	31.8596	2.10191e-08	1.40128e-09	1.81429e-07
Module 1	KEGG_PATHWAY	hsa04068:FoxO signaling pathway	11	33.3333	1.68413e-10	PIK3CG, AKT1, EGFR, MAPK1, CCND1, CDKN1B, PIK3CB, PIK3CD, PIK3CA, FOXO1, EGF	32	134	6910	17.7262	2.29042e-08	1.43151e-09	1.977e-07
Module 1	KEGG_PATHWAY	hsa05210:Colorectal cancer	9	27.2727	1.76921e-10	PIK3CG, AKT1, MAPK1, CCND1, PIK3CB, BCL2, PIK3CD, TP53, PIK3CA	32	62	6910	31.3458	2.40613e-08	1.41537e-09	2.07687e-07
Module 1	KEGG_PATHWAY	hsa05161:Hepatitis B	11	33.3333	3.69129e-10	PIK3CG, AKT1, MAPK1, CCND1, CDKN1B, PIK3CB, BCL2, PIK3CD, PCNA, TP53, PIK3CA	32	145	6910	16.3815	5.02015e-08	2.78897e-09	4.3332e-07
Module 1	KEGG_PATHWAY	hsa05205:Proteoglycans in cancer	12	36.3636	4.63333e-10	PIK3CG, AKT1, EGFR, MAPK1, CCND1, PIK3CB, ERBB2, PIK3CD, VEGFA, TP53, PIK3CA, MTOR	32	200	6910	12.9563	6.30133e-08	3.31649e-09	5.43907e-07
Module 1	KEGG_PATHWAY	hsa05220:Chronic myeloid leukemia	9	27.2727	6.07892e-10	PIK3CG, AKT1, MAPK1, CCND1, CDKN1B, PIK3CB, PIK3CD, TP53, PIK3CA	32	72	6910	26.9922	8.26733e-08	4.13367e-09	7.13604e-07
Module 1	KEGG_PATHWAY	hsa04510:Focal adhesion	12	36.3636	6.36235e-10	PIK3CG, AKT1, EGFR, MAPK1, CCND1, PIK3CB, BCL2, ERBB2, PIK3CD, VEGFA, PIK3CA, EGF	32	206	6910	12.5789	8.6528e-08	4.12038e-09	7.46876e-07
Module 1	KEGG_PATHWAY	hsa04919:Thyroid hormone signaling pathway	10	30.303	9.79909e-10	PIK3CG, AKT1, MAPK1, CCND1, PIK3CB, PIK3CD, TP53, PIK3CA, FOXO1, MTOR	32	114	6910	18.9419	1.33268e-07	6.05762e-09	1.15031e-06
Module 1	KEGG_PATHWAY	hsa05222:Small cell lung cancer	9	27.2727	2.35113e-09	PIK3CG, AKT1, CCND1, PTGS2, PIK3CB, BCL2, PIK3CD, TP53, PIK3CA	32	85	6910	22.864	3.19754e-07	1.39023e-08	2.75999e-06
Module 1	KEGG_PATHWAY	hsa05221:Acute myeloid leukemia	8	24.2424	3.52908e-09	PIK3CG, AKT1, MAPK1, CCND1, PIK3CB, PIK3CD, PIK3CA, MTOR	32	56	6910	30.8482	4.79955e-07	1.99981e-08	4.14279e-06
Module 1	KEGG_PATHWAY	hsa05231:Choline metabolism in cancer	9	27.2727	9.41222e-09	PIK3CG, AKT1, EGFR, MAPK1, PIK3CB, PIK3CD, PIK3CA, MTOR, EGF	32	101	6910	19.242	1.28006e-06	5.12025e-08	1.1049e-05
Module 1	KEGG_PATHWAY	hsa05219:Bladder cancer	7	21.2121	1.96795e-08	EGFR, MAPK1, CCND1, ERBB2, VEGFA, TP53, EGF	32	41	6910	36.8674	2.6764e-06	1.02939e-07	2.31017e-05
Module 1	KEGG_PATHWAY	hsa04071:Sphingolipid signaling pathway	9	27.2727	3.69692e-08	PIK3CG, AKT1, MAPK1, PIK3CB, BCL2, PIK3CD, TP53, PIK3CA, NOS3	32	120	6910	16.1953	5.0278e-06	1.86215e-07	4.33981e-05
Module 1	KEGG_PATHWAY	hsa05160:Hepatitis C	9	27.2727	8.29063e-08	PIK3CG, AKT1, EGFR, MAPK1, PIK3CB, PIK3CD, TP53, PIK3CA, EGF	32	133	6910	14.6123	1.12752e-05	4.02688e-07	9.73236e-05
Module 1	KEGG_PATHWAY	hsa05166:HTLV-I infection	11	33.3333	9.12109e-08	PIK3CG, POLD3, AKT1, CCND1, PIK3CB, POLD1, PIK3CD, POLD2, PCNA, TP53, PIK3CA	32	256	6910	9.27856	1.24046e-05	4.27747e-07	0.000107072
Module 1	KEGG_PATHWAY	hsa04150:mTOR signaling pathway	7	21.2121	1.68008e-07	PIK3CG, AKT1, MAPK1, PIK3CB, PIK3CD, PIK3CA, MTOR	32	58	6910	26.0614	2.28488e-05	7.61635e-07	0.000197224
Module 1	KEGG_PATHWAY	hsa04915:Estrogen signaling pathway	8	24.2424	1.98574e-07	PIK3CG, AKT1, EGFR, MAPK1, PIK3CB, PIK3CD, PIK3CA, NOS3	32	99	6910	17.4495	2.70057e-05	8.71163e-07	0.000233106
Module 1	KEGG_PATHWAY	hsa04210:Apoptosis	7	21.2121	2.52009e-07	PIK3CG, AKT1, PIK3CB, BCL2, PIK3CD, TP53, PIK3CA	32	62	6910	24.38	3.42726e-05	1.07104e-06	0.000295833
Module 1	KEGG_PATHWAY	hsa03410:Base excision repair	6	18.1818	2.8169e-07	POLD3, LIG1, POLD1, POLD2, PCNA, FEN1	32	33	6910	39.2614	3.83091e-05	1.1609e-06	0.000330675
Module 1	KEGG_PATHWAY	hsa04921:Oxytocin signaling pathway	9	27.2727	3.15793e-07	PIK3CG, EGFR, MAPK1, CCND1, PTGS2, PIK3CB, PIK3CD, PIK3CA, NOS3	32	158	6910	12.3002	4.29469e-05	1.26317e-06	0.000370708
Module 1	KEGG_PATHWAY	hsa05211:Renal cell carcinoma	7	21.2121	3.35452e-07	PIK3CG, AKT1, MAPK1, PIK3CB, PIK3CD, VEGFA, PIK3CA	32	65	6910	23.2548	4.56205e-05	1.30347e-06	0.000393787
Module 1	KEGG_PATHWAY	hsa04931:Insulin resistance	8	24.2424	3.61791e-07	PIK3CG, AKT1, PIK3CB, PIK3CD, PIK3CA, FOXO1, NOS3, MTOR	32	108	6910	15.9954	4.92024e-05	1.36677e-06	0.000424705
Module 1	KEGG_PATHWAY	hsa04917:Prolactin signaling pathway	7	21.2121	5.70856e-07	PIK3CG, AKT1, MAPK1, CCND1, PIK3CB, PIK3CD, PIK3CA	32	71	6910	21.2896	7.76335e-05	2.09828e-06	0.000670126
Module 1	KEGG_PATHWAY	hsa04722:Neurotrophin signaling pathway	8	24.2424	7.43925e-07	PIK3CG, AKT1, MAPK1, PIK3CB, BCL2, PIK3CD, TP53, PIK3CA	32	120	6910	14.3958	0.000101169	2.66247e-06	0.00087329
Module 1	KEGG_PATHWAY	hsa04152:AMPK signaling pathway	8	24.2424	8.32533e-07	PIK3CG, AKT1, CCND1, PIK3CB, PIK3CD, PIK3CA, FOXO1, MTOR	32	122	6910	14.1598	0.000113218	2.90319e-06	0.000977306
Module 1	KEGG_PATHWAY	hsa05162:Measles	8	24.2424	1.4947e-06	PIK3CG, AKT1, CCND1, CDKN1B, PIK3CB, PIK3CD, TP53, PIK3CA	32	133	6910	12.9887	0.000203258	5.08196e-06	0.00175461
Module 1	KEGG_PATHWAY	hsa04910:Insulin signaling pathway	8	24.2424	1.91703e-06	PIK3CG, AKT1, MAPK1, PIK3CB, PIK3CD, PIK3CA, FOXO1, MTOR	32	138	6910	12.5181	0.000260683	6.35892e-06	0.00225038
Module 1	KEGG_PATHWAY	hsa04930:Type II diabetes mellitus	6	18.1818	1.93861e-06	PIK3CG, MAPK1, PIK3CB, PIK3CD, PIK3CA, MTOR	32	48	6910	26.9922	0.000263617	6.2774e-06	0.00227571
Module 1	KEGG_PATHWAY	hsa04015:Rap1 signaling pathway	9	27.2727	2.75058e-06	PIK3CG, AKT1, EGFR, MAPK1, PIK3CB, PIK3CD, VEGFA, PIK3CA, EGF	32	210	6910	9.25446	0.000374009	8.69948e-06	0.00322886
Module 1	KEGG_PATHWAY	hsa04923:Regulation of lipolysis in adipocytes	6	18.1818	4.21714e-06	PIK3CG, AKT1, PTGS2, PIK3CB, PIK3CD, PIK3CA	32	56	6910	23.1362	0.000573367	1.30347e-05	0.00495038
Module 1	KEGG_PATHWAY	hsa04014:Ras signaling pathway	9	27.2727	4.76127e-06	PIK3CG, AKT1, EGFR, MAPK1, PIK3CB, PIK3CD, VEGFA, PIK3CA, EGF	32	226	6910	8.59928	0.000647324	1.43895e-05	0.0055891
Module 1	KEGG_PATHWAY	hsa04668:TNF signaling pathway	7	21.2121	6.09533e-06	PIK3CG, AKT1, MAPK1, PTGS2, PIK3CB, PIK3CD, PIK3CA	32	106	6910	14.26	0.000828624	1.80209e-05	0.00715507
Module 1	KEGG_PATHWAY	hsa04725:Cholinergic synapse	7	21.2121	7.96479e-06	PIK3CG, AKT1, MAPK1, PIK3CB, BCL2, PIK3CD, PIK3CA	32	111	6910	13.6177	0.00108263	2.30469e-05	0.00934947
Module 3	KEGG_PATHWAY	hsa04110:Cell cycle	4	100	5.6421e-06	CCNB1, CDC6, CCNB2, MCM5	4	124	6910	55.7258	2.82102e-05	2.82102e-05	0.00245376
